# Supplementary material for: Melatonin Induces Parthenocarpy by Regulating Genes in Gibberellin Pathways of ‘Starkrimson’ Pear (Pyrus communis L.)
Source: Front Plant Sci. 2018 Jul 4;9:946. doi: 10.3389/fpls.2018.00946 (PMC6040045; doi:10.3389/fpls.2018.00946)
Supplement: Supplementary file 5 [file Table_5.XLSX]

## Sheet: Table S5
Supplementary Table S5. Photosynthesis and carbohydrate metabolism related genes
Name	Gene	Predict Description	Fold Change (log2)
			MTvsCK	NPvsCK	MPvsCK
PS.lightreaction.photosystem II.LHC-II	LOC103926626	chlorophyll a-b binding protein 6, chloroplastic-like	1.1052	1.4869	-
PS.lightreaction.photosystem II.LHC-II	LOC103927393	chlorophyll a-b binding protein 13, chloroplastic	3.206	3.2413	-
PS.lightreaction.photosystem II.LHC-II	LOC103929687	chlorophyll a-b binding protein, chloroplastic	1.2876	1.9552	-
PS.lightreaction.photosystem II.LHC-II	LOC103934433	chlorophyll a-b binding protein 13, chloroplastic	2.7785	2.4029	-
PS.lightreaction.photosystem II.LHC-II	LOC103935439	chlorophyll a-b binding protein 151, chloroplastic	3.42	3.0607	-
PS.lightreaction.photosystem II.LHC-II	LOC103936594	chlorophyll a-b binding protein CP29.1, chloroplastic-like	0.90095	1.7465	-
PS.lightreaction.photosystem II.LHC-II	LOC103937518	chlorophyll a-b binding protein CP29.3, chloroplastic-like	-1.232	1.8469	-
PS.lightreaction.photosystem II.LHC-II	LOC103951255	chlorophyll a-b binding protein of LHCII type 1	2.6959	2.7269	-
PS.lightreaction.photosystem II.LHC-II	LOC103951337	chlorophyll a-b binding protein of LHCII type 1-like	2.2653	1.698	-
PS.lightreaction.photosystem II.LHC-II	LOC103952579	chlorophyll a-b binding protein CP24 10A, chloroplastic-like	2.2228	1.7842	-
PS.lightreaction.photosystem II.LHC-II	LOC103953090	chlorophyll a-b binding protein of LHCII type 1-like	0.53842	-	-
PS.lightreaction.photosystem II.LHC-II	LOC103955064	chlorophyll a-b binding protein 151, chloroplastic-like	3.0544	2.6264	-
PS.lightreaction.photosystem II.LHC-II	LOC103956592	chlorophyll a-b binding protein CP26, chloroplastic-like	1.6521	2.026	-
PS.lightreaction.photosystem II.LHC-II	LOC103956843	chlorophyll a-b binding protein of LHCII type 1-like	1.8702	1.9991	-
PS.lightreaction.photosystem II.LHC-II	LOC103959998	chlorophyll a-b binding protein CP26, chloroplastic-like	1.8549	2.0095	-
PS.lightreaction.photosystem II.LHC-II	LOC103961459	chlorophyll a-b binding protein, chloroplastic	1.5845	1.7234	-
PS.lightreaction.photosystem II.LHC-II	LOC103961783	chlorophyll a-b binding protein of LHCII type 1	-1.5694	-1.1036	-1.5625
PS.lightreaction.photosystem II.LHC-II	LOC103964906	chlorophyll a-b binding protein of LHCII type 1-like	0.2667	0.21525	-
PS.lightreaction.photosystem II.LHC-II	LOC103965954	chlorophyll a-b binding protein of LHCII type 1-like	-1.7989	-4.9458	-2.5645
PS.lightreaction.photosystem II.LHC-II	LOC103966344	chlorophyll a-b binding protein CP29.1, chloroplastic	0.669	1.647	-
PS.lightreaction.photosystem II.LHC-II	LOC103966631	chlorophyll a-b binding protein 6, chloroplastic	0.44039	0.92829	-
PS.lightreaction.photosystem II.LHC-II	LOC103967973	chlorophyll a-b binding protein CP24 10A, chloroplastic	3.0516	3.0532	-
PS.lightreaction.photosystem I.LHC-I	LOC103931352	chlorophyll a-b binding protein P4, chloroplastic	1.0272	1.3656	-
Name	Gene	Predict Description	Fold Change (log2)
			MTvsCK	HPvsCK	MPvsCK
PS.lightreaction.photosystem I.LHC-I	LOC103950058	photosystem I chlorophyll a/b-binding protein 5, chloroplastic-like	-	2.2278	-
PS.lightreaction.photosystem I.LHC-I	LOC103927891	probable basic-leucine zipper transcription factor R	1.9679	-	-
PS.lightreaction.photosystem I.LHC-I	LOC103937964	probable basic-leucine zipper transcription factor R	0.84273	1.2165	-
PS.lightreaction.photosystem II.PSII polypeptide subunits	LOC103928222	psbP domain-containing protein 1, chloroplastic-like	1.171	1.8781	-
PS.lightreaction.photosystem II.PSII polypeptide subunits	LOC103928559	psbP-like protein 1, chloroplastic	1.5846	1.6719	0.94217
PS.lightreaction.photosystem II.PSII polypeptide subunits	LOC103930010	psbP-like protein 1, chloroplastic	2.2395	2.4225	1.6136
PS.lightreaction.photosystem II.PSII polypeptide subunits	LOC103939990	psbP domain-containing protein 2, chloroplastic-like	-	1.3145	-
PS.lightreaction.photosystem II.PSII polypeptide subunits	LOC103948373	psbP-like protein 1, chloroplastic	2.0143	1.9949	-
PS.lightreaction.photosystem II.PSII polypeptide subunits	LOC103951357	psbP domain-containing protein 6, chloroplastic	0.69643	1.7475	-
PS.lightreaction.photosystem II.PSII polypeptide subunits	LOC103952918	psbP domain-containing protein 3, chloroplastic-like	1.7829	2.775	1.3025
PS.lightreaction.photosystem II.PSII polypeptide subunits	LOC103961801	psbP domain-containing protein 3, chloroplastic-like	-	1.5292	-
PS.lightreaction.photosystem II.PSII polypeptide subunits	LOC103962339	psbP domain-containing protein 1, chloroplastic-like	1.1081	1.6508	-
PS.lightreaction.photosystem II.PSII polypeptide subunits	LOC103964571	psbP domain-containing protein 2, chloroplastic-like	-	2.2006	-
PS.lightreaction.photosystem II.PSII polypeptide subunits	LOC103966103	psbP domain-containing protein 5, chloroplastic	-	0.75161	-
PS.lightreaction.photosystem II.PSII polypeptide subunits	LOC103966283	psbP domain-containing protein 4, chloroplastic-like	-	1.8044	-
PS.lightreaction.photosystem II.PSII polypeptide subunits	LOC103926797	photosystem II core complex proteins psbY, chloroplastic-like	-5.5704	-6.9039	-2.4741
PS.lightreaction.photosystem II.PSII polypeptide subunits	LOC103927965	photosystem II reaction center PSB28 protein, chloroplastic-like	1.0338	2.6008	0.84358
PS.lightreaction.photosystem II.PSII polypeptide subunits	LOC103936181	photosystem II 10 kDa polypeptide, chloroplastic-like	1.1926	5.7768	1.32
PS.lightreaction.photosystem II.PSII polypeptide subunits	LOC103940303	photosystem II 22 kDa protein, chloroplastic	0.6982	2.9035	0.89323
PS.lightreaction.photosystem II.PSII polypeptide subunits	LOC103942744	photosystem II 5 kDa protein, chloroplastic-like	1.6948	1.767	-
PS.lightreaction.photosystem II.PSII polypeptide subunits	LOC103943208	photosystem II stability/assembly factor HCF136, chloroplastic	-	0.50299	-
PS.lightreaction.photosystem II.PSII polypeptide subunits	LOC103946003	photosystem II reaction center W protein, chloroplastic-like	1.5756	2.9945	-
PS.lightreaction.photosystem II.PSII polypeptide subunits	LOC103947836	photosystem II repair protein PSB27-H1, chloroplastic	2.2779	2.6558	1.7085
PS.lightreaction.photosystem II.PSII polypeptide subunits	LOC103949857	photosystem II core complex proteins psbY, chloroplastic	0.74966	1.7859	-
PS.lightreaction.photosystem II.PSII polypeptide subunits	LOC103951972	photosystem II 10 kDa polypeptide, chloroplastic-like	-1.9117	-2.127	-1.8048
PS.lightreaction.photosystem II.PSII polypeptide subunits	LOC103955907	photosystem II 5 kDa protein, chloroplastic-like	1.7605	2.0425	-
PS.lightreaction.photosystem II.PSII polypeptide subunits	LOC103957316	photosystem II reaction center W protein, chloroplastic-like	0.41615	1.1881	-
PS.lightreaction.photosystem II.PSII polypeptide subunits	LOC103959077	photosystem II 5 kDa protein, chloroplastic-like	0.40639	0.74794	-
PS.lightreaction.photosystem II.PSII polypeptide subunits	LOC103959875	photosystem II reaction center Psb28 protein-like	0.56293	1.9123	-
PS.lightreaction.photosystem II.PSII polypeptide subunits	LOC103963808	photosystem II 5 kDa protein, chloroplastic-like	0.33895	0.42475	-
PS.lightreaction.photosystem II.PSII polypeptide subunits	LOC103933926	oxygen-evolving enhancer protein 1, chloroplastic-like	-	1.8785	-
PS.lightreaction.photosystem II.PSII polypeptide subunits	LOC103933944	oxygen-evolving enhancer protein 1, chloroplastic-like	1.4002	1.936	-
PS.lightreaction.photosystem II.PSII polypeptide subunits	LOC103947401	oxygen-evolving enhancer protein 2, chloroplastic-like	0.32531	1.1069	-
PS.lightreaction.photosystem II.PSII polypeptide subunits	LOC103956260	oxygen-evolving enhancer protein 3-2, chloroplastic	0.97982	1.6168	-
PS.lightreaction.photosystem II.PSII polypeptide subunits	LOC103965174	oxygen-evolving enhancer protein 1, chloroplastic	1.0648	1.9793	-
PS.lightreaction.photosystem II.PSII polypeptide subunits	LOC103965639	oxygen-evolving enhancer protein 2, chloroplastic-like	-	0.97894	-
PS.lightreaction.photosystem II.PSII polypeptide subunits	LOC103967609	oxygen-evolving enhancer protein 1, chloroplastic	0.34451	0.83657	-
PS.lightreaction.photosystem II.PSII polypeptide subunits	LOC103930012	photosynthetic NDH subunit of lumenal location 1, chloroplastic-like	1.2406	2.5586	-
PS.lightreaction.photosystem II.PSII polypeptide subunits	LOC103935101	photosynthetic NDH subunit of lumenal location 5, chloroplastic-like	0.69035	1.5211	0.69799
PS.lightreaction.photosystem II.PSII polypeptide subunits	LOC103946577	photosynthetic NDH subunit of lumenal location 3, chloroplastic-like	1.5752	2.2375	1.3106
PS.lightreaction.photosystem II.PSII polypeptide subunits	LOC103948374	photosynthetic NDH subunit of lumenal location 1, chloroplastic-like	-	1.2931	-
PS.lightreaction.photosystem II.PSII polypeptide subunits	LOC103948750	photosynthetic NDH subunit of lumenal location 3, chloroplastic-like	-	2.7417	-
PS.lightreaction.photosystem II.PSII polypeptide subunits	LOC103959274	photosynthetic NDH subunit of lumenal location 4, chloroplastic-like	0.69237	2.3429	-
PS.lightreaction.photosystem II.PSII polypeptide subunits	LOC103961426	photosynthetic NDH subunit of lumenal location 5, chloroplastic	0.72233	2.3093	0.84231
PS.lightreaction.photosystem II.PSII polypeptide subunits	LOC103933887	psbQ-like protein 3, chloroplastic	1.7479	1.7822	-
PS.lightreaction.photosystem I.PSI polypeptide subunits	LOC103930397	photosystem I reaction center subunit XI, chloroplastic	1.3759	3.0038	1.18
PS.lightreaction.photosystem I.PSI polypeptide subunits	LOC103930429	photosystem I reaction center subunit VI-2, chloroplastic-like	1.2235	1.8605	-
PS.lightreaction.photosystem I.PSI polypeptide subunits	LOC103930446	photosystem I reaction center subunit VI-2, chloroplastic-like	1.2363	2.146	0.73763
PS.lightreaction.photosystem I.PSI polypeptide subunits	LOC103932947	photosystem I subunit O-like	-	1.1904	-
PS.lightreaction.photosystem I.PSI polypeptide subunits	LOC103933402	photosystem I reaction center subunit N, chloroplastic-like	0.61634	1.8414	-
PS.lightreaction.photosystem I.PSI polypeptide subunits	LOC103935974	photosystem I reaction center subunit II, chloroplastic-like	0.61739	0.85875	-
PS.lightreaction.photosystem I.PSI polypeptide subunits	LOC103936460	photosystem I subunit O-like	1.0018	3.1688	0.73934
PS.lightreaction.photosystem I.PSI polypeptide subunits	LOC103938417	photosystem I reaction center subunit V, chloroplastic-like	2.2934	2.8316	-
PS.lightreaction.photosystem I.PSI polypeptide subunits	LOC103944859	photosystem I reaction center subunit VI-2, chloroplastic	1.3824	3.1351	0.75009
PS.lightreaction.photosystem I.PSI polypeptide subunits	LOC103945111	photosystem I reaction center subunit III, chloroplastic	1.6315	2.3504	-
PS.lightreaction.photosystem I.PSI polypeptide subunits	LOC103952396	photosystem I reaction center subunit psaK, chloroplastic-like	1.0122	1.6615	-
PS.lightreaction.photosystem I.PSI polypeptide subunits	LOC103956623	photosystem I reaction center subunit II, chloroplastic-like	1.505	2.3078	1.4462
PS.lightreaction.photosystem I.PSI polypeptide subunits	LOC103960252	photosystem I reaction center subunit IV B, chloroplastic	0.99321	1.7726	-
PS.lightreaction.photosystem I.PSI polypeptide subunits	LOC103961116	photosystem I reaction center subunit III, chloroplastic-like	0.666	1.6757	-
PS.lightreaction.photosystem I.PSI polypeptide subunits	LOC103963155	photosystem I reaction center subunit N, chloroplastic-like	2.7747	3.3346	2.0917
PS.lightreaction.photosystem I.PSI polypeptide subunits	LOC103963837	photosystem I subunit O-like	-0.4762	-	-0.94955
PS.lightreaction.photosystem I.PSI polypeptide subunits	LOC103966064	photosystem I reaction center subunit psaK, chloroplastic-like	1.3067	1.4911	-
PS.lightreaction.photosystem I.PSI polypeptide subunits	LOC103967572	photosystem I reaction center subunit V, chloroplastic-like	2.1742	3.1464	-
PS.lightreaction.state tra-ition	LOC103927119	probable serine/threonine-protein kinase At4g35230	0.56776	0.62024	-
PS.lightreaction.state tra-ition	LOC103928836	probable serine/threonine-protein kinase At1g54610	-1.1341	-2.1392	-0.93711
PS.lightreaction.state tra-ition	LOC103929363	probable serine/threonine-protein kinase At4g35230	-1.7482	-2.9942	-2.9715
PS.lightreaction.state tra-ition	LOC103929458	probable serine/threonine-protein kinase At1g54610	-3.862	-4.952	-2.9176
PS.lightreaction.state tra-ition	LOC103929832	probable serine/threonine-protein kinase At5g41260	0.52451	1.3211	-
PS.lightreaction.state tra-ition	LOC103929833	probable serine/threonine-protein kinase At5g41260	-	-1.5993	-
PS.lightreaction.state tra-ition	LOC103929984	probable serine/threonine-protein kinase At1g54610	0.7037	0.66862	-
PS.lightreaction.state tra-ition	LOC103931137	probable serine/threonine-protein kinase At1g54610	0.63215	1.2247	-
PS.lightreaction.state tra-ition	LOC103931375	probable serine/threonine-protein kinase At1g54610	1.0099	1.3978	0.97752
PS.lightreaction.state tra-ition	LOC103933116	probable serine/threonine-protein kinase At1g54610	0.32103	0.23195	-
PS.lightreaction.state tra-ition	LOC103934011	probable serine/threonine-protein kinase At1g54610	-1.0138	-2.3298	-1.1578
PS.lightreaction.state tra-ition	LOC103934038	probable serine/threonine-protein kinase At1g54610	-	0.21263	-
PS.lightreaction.state tra-ition	LOC103935139	probable serine/threonine-protein kinase At1g01540	1.6156	-	-
PS.lightreaction.state tra-ition	LOC103935251	probable serine/threonine-protein kinase At1g01540	1.3139	1.1471	0.99272
PS.lightreaction.state tra-ition	LOC103937734	probable serine/threonine-protein kinase At1g01540	1.5432	-	-
PS.lightreaction.state tra-ition	LOC103938387	probable serine/threonine-protein kinase At1g54610	-	-	1.3655
PS.lightreaction.state tra-ition	LOC103938687	probable serine/threonine-protein kinase At5g41260	0.51974	0.42078	-
PS.lightreaction.state tra-ition	LOC103941341	probable serine/threonine-protein kinase At1g01540	-	-0.34521	-
PS.lightreaction.state tra-ition	LOC103941935	probable serine/threonine-protein kinase At4g35230	-1.1894	-1.5329	-1.4795
PS.lightreaction.state tra-ition	LOC103942122	probable serine/threonine-protein kinase At4g35230	-	0.26083	-
PS.lightreaction.state tra-ition	LOC103942713	probable serine/threonine-protein kinase At1g01540	-1.5911	-2.0079	-1.8339
PS.lightreaction.state tra-ition	LOC103943614	probable serine/threonine-protein kinase At1g54610	-	0.78319	-
PS.lightreaction.state tra-ition	LOC103945017	probable serine/threonine-protein kinase At1g09600	2.0399	2.341	1.5538
PS.lightreaction.state tra-ition	LOC103946383	probable serine/threonine-protein kinase At1g09600	1.3997	1.4594	0.8216
PS.lightreaction.state tra-ition	LOC103947613	probable serine/threonine-protein kinase At1g54610	1.5557	1.5245	1.0571
PS.lightreaction.state tra-ition	LOC103947936	probable serine/threonine-protein kinase At1g09600	-	-2.7028	-1.2498
PS.lightreaction.state tra-ition	LOC103949420	probable serine/threonine-protein kinase At5g41260	0.69127	1.366	0.74645
PS.lightreaction.state tra-ition	LOC103950340	probable serine/threonine-protein kinase At1g01540	0.52334	1.278	1.1862
PS.lightreaction.state tra-ition	LOC103951027	probable serine/threonine-protein kinase At1g54610	-	1.7273	-
PS.lightreaction.state tra-ition	LOC103954460	probable serine/threonine-protein kinase At1g54610	-1.204	-0.81396	-0.84418
PS.lightreaction.state tra-ition	LOC103956307	probable serine/threonine-protein kinase At1g01540	-1.318	-1.5868	-1.433
PS.lightreaction.state tra-ition	LOC103956896	probable serine/threonine-protein kinase At1g01540	1.3105	-	-
PS.lightreaction.state tra-ition	LOC103958555	probable serine/threonine-protein kinase At1g54610	-6.0007	-5.6205	-2.3387
PS.lightreaction.state tra-ition	LOC103962471	probable serine/threonine-protein kinase At4g35230	1.6355	1.491	1.2769
PS.lightreaction.state tra-ition	LOC103963256	probable serine/threonine-protein kinase At5g41260	-	-1.3583	-
PS.lightreaction.state tra-ition	LOC103963257	probable serine/threonine-protein kinase At5g41260	-0.39619	-1.1835	-0.89641
PS.lightreaction.state tra-ition	LOC103965718	probable serine/threonine-protein kinase At4g35230	1.1559	1.117	-
PS.lightreaction.state tra-ition	LOC103967458	probable serine/threonine-protein kinase At4g35230	1.6401	-	-
PS.lightreaction.state tra-ition	LOC103928247	probable receptor-like protein kinase At5g18500	-	-	-
PS.lightreaction.state tra-ition	LOC103928500	probable receptor-like protein kinase At5g15080	-0.37734	-0.43111	-
PS.lightreaction.state tra-ition	LOC103928584	probable receptor-like protein kinase At2g39360	0.43466	-0.84546	-
PS.lightreaction.state tra-ition	LOC103930350	probable receptor-like protein kinase At5g18500	-2.1384	-6.846	-2.8863
PS.lightreaction.state tra-ition	LOC103930896	probable receptor-like protein kinase At5g15080	-0.78539	-0.81476	-0.80667
PS.lightreaction.state tra-ition	LOC103931144	probable receptor-like protein kinase At5g61350	-1.4869	-1.6128	-1.4958
PS.lightreaction.state tra-ition	LOC103934844	probable receptor-like protein kinase At5g15080	0.2833	0.47481	-
PS.lightreaction.state tra-ition	LOC103936300	probable receptor-like protein kinase At1g30570	1.575	1.4416	1.0016
PS.lightreaction.state tra-ition	LOC103937998	probable receptor-like protein kinase At1g49730	1.1476	0.78102	0.78757
PS.lightreaction.state tra-ition	LOC103938743	probable receptor-like protein kinase At5g15080	1.7657	1.8431	1.7582
PS.lightreaction.state tra-ition	LOC103940001	probable receptor-like protein kinase At1g11050	-0.79583	-	-
PS.lightreaction.state tra-ition	LOC103942307	probable receptor-like protein kinase At5g47070	-0.50877	-1.4935	-
PS.lightreaction.state tra-ition	LOC103944683	probable receptor-like protein kinase At5g18500	0.44317	0.49386	-
PS.lightreaction.state tra-ition	LOC103944910	probable receptor-like protein kinase At5g47070	-	-0.54951	-
PS.lightreaction.state tra-ition	LOC103946310	probable receptor-like protein kinase At1g11050	-1.0459	-1.4693	-
PS.lightreaction.state tra-ition	LOC103946753	probable receptor-like protein kinase At1g80640	-0.61811	-0.40686	-
PS.lightreaction.state tra-ition	LOC103947433	probable receptor-like protein kinase At2g42960	-1.838	-2.505	-1.5611
PS.lightreaction.state tra-ition	LOC103950791	probable receptor-like protein kinase At1g33260	-	3.5169	-
PS.lightreaction.state tra-ition	LOC103951076	probable receptor-like protein kinase At2g42960	1.9191	-	-
PS.lightreaction.state tra-ition	LOC103952474	probable receptor-like protein kinase At1g80640	-	1.1417	-
PS.lightreaction.state tra-ition	LOC103953860	probable receptor-like protein kinase At2g23200	-0.62569	-0.77626	-0.68179
PS.lightreaction.state tra-ition	LOC103954304	probable receptor-like protein kinase At5g47070	-	-1.1303	-0.763
PS.lightreaction.state tra-ition	LOC103955855	probable receptor-like protein kinase At5g18500	-1.254	-1.5339	-1.3677
PS.lightreaction.state tra-ition	LOC103958222	probable receptor-like protein kinase At5g24010	0.23745	-0.29859	-
PS.lightreaction.state tra-ition	LOC103958378	probable receptor-like protein kinase At5g47070	-0.4999	-0.70538	-
PS.lightreaction.state tra-ition	LOC103960229	probable receptor-like protein kinase At5g47070	-3.4384	-4.859	-2.8954
PS.lightreaction.state tra-ition	LOC103961071	probable receptor-like protein kinase At5g47070	-0.77811	-1.7353	-
PS.lightreaction.state tra-ition	LOC103961210	probable receptor-like protein kinase At3g55450	-0.50472	-	-
PS.lightreaction.state tra-ition	LOC103961607	probable receptor-like protein kinase At2g23200	-0.92422	-1.3385	-0.83109
PS.lightreaction.state tra-ition	LOC103961610	probable receptor-like protein kinase At2g23200	-0.31113	-0.73285	-
PS.lightreaction.state tra-ition	LOC103962079	probable receptor-like protein kinase At4g39110	-	-3.432	-
PS.lightreaction.state tra-ition	LOC103962658	probable receptor-like protein kinase At4g10390	-	1.5604	-
PS.lightreaction.state tra-ition	LOC103962863	probable receptor-like protein kinase At1g11050	-	0.90658	2.451
PS.lightreaction.state tra-ition	LOC103964317	probable receptor-like protein kinase At5g24010	0.84912	0.91837	-
PS.lightreaction.state tra-ition	LOC103964799	probable receptor-like protein kinase At5g56460	-1.0704	-1.8931	-0.63539
PS.lightreaction.state tra-ition	LOC103964883	probable receptor-like protein kinase At5g47070	-3.0566	-4.1017	-2.0891
PS.lightreaction.state tra-ition	LOC103965466	probable receptor-like protein kinase At5g47070	-2.2865	-2.6112	-1.6247
PS.lightreaction.state tra-ition	LOC103965971	probable receptor-like protein kinase At2g42960	0.64569	0.56764	-
PS.lightreaction.state tra-ition	LOC103966890	probable receptor-like protein kinase At5g47070	-1.2324	-2.5037	-0.8786
PS.lightreaction.ATP synthase.gamma chain	LOC103931021	ATP synthase gamma chain, chloroplastic-like	-	1.1798	1.1925
PS.lightreaction.ATP synthase.gamma chain	LOC103946845	ATP synthase gamma chain, chloroplastic-like	0.40873	0.55354	-
PS.lightreaction.ATP synthase.gamma chain	LOC103948177	ATP synthase gamma chain, chloroplastic	0.344	1.8396	-
PS.lightreaction.ATP synthase.gamma chain	LOC103950613	ATP synthase gamma chain, chloroplastic-like	0.45979	1.7952	-
PS.lightreaction.ATP synthase.gamma chain	LOC103951453	ATP synthase gamma chain, chloroplastic-like	-	1.059	1.3454
PS.lightreaction.cyclic electron flow-chlororespiration	LOC103927033	protein PROTON GRADIENT REGULATION 5, chloroplastic-like	0.78591	1.1039	0.92025
PS.lightreaction.cyclic electron flow-chlororespiration	LOC103948669	protein PROTON GRADIENT REGULATION 5, chloroplastic-like	-	1.4323	-
PS.lightreaction.cyclic electron flow-chlororespiration	LOC103952864	PGR5-like protein 1A, chloroplastic	-0.9337	-	-
PS.lightreaction.cyclic electron flow-chlororespiration	LOC103954297	PGR5-like protein 1B, chloroplastic	-1.888	-1.9328	-1.3522
PS.lightreaction.other electron carrier (ox/red).plastocyanin	LOC103927331	plastocyanin	1.4975	2.8495	-
PS.lightreaction.other electron carrier (ox/red).ferredoxin	LOC103929792	photosynthetic NDH subunit of subcomplex B 5, chloroplastic-like	-	-	-
PS.lightreaction.other electron carrier (ox/red).ferredoxin	LOC103931240	photosynthetic NDH subunit of subcomplex B 5, chloroplastic-like	-	1.2936	-
PS.lightreaction.other electron carrier (ox/red).ferredoxin	LOC103931297	photosynthetic NDH subunit of subcomplex B 4, chloroplastic-like	2.4301	3.5124	-
PS.lightreaction.other electron carrier (ox/red).ferredoxin	LOC103931316	photosynthetic NDH subunit of subcomplex B 4, chloroplastic-like	1.4035	1.9996	-
PS.lightreaction.other electron carrier (ox/red).ferredoxin	LOC103944839	photosynthetic NDH subunit of subcomplex B 3, chloroplastic	1.1461	-	-
PS.lightreaction.other electron carrier (ox/red).ferredoxin	LOC103959001	photosynthetic NDH subunit of subcomplex B 5, chloroplastic-like	-	1.2346	-
PS.lightreaction.other electron carrier (ox/red).ferredoxin	LOC103966093	photosynthetic NDH subunit of subcomplex B 3, chloroplastic	-2.0053	-	-1.4153
PS.lightreaction.other electron carrier (ox/red).ferredoxin	LOC103966441	photosynthetic NDH subunit of subcomplex B 3, chloroplastic-like	1.5241	3.0372	1.3119
PS.lightreaction.cyclic electron flow-chlororespiration	LOC103967405	photosynthetic NDH subunit of subcomplex B 2, chloroplastic	-	2.1596	-
PS.lightreaction.NADH DH	LOC103940436	NAD(P)H-quinone oxidoreductase subunit S, chloroplastic-like	-1.8363	-1.3382	-1.7098
PS.lightreaction.NADH DH	LOC103941060	NAD(P)H-quinone oxidoreductase subunit L, chloroplastic-like	-	3.6169	-
PS.lightreaction.NADH DH	LOC103943041	NAD(P)H-quinone oxidoreductase subunit L, chloroplastic	-	5.9001	-
PS.lightreaction.NADH DH	LOC103945202	NAD(P)H-quinone oxidoreductase subunit M, chloroplastic-like	-	1.0463	-
PS.lightreaction.NADH DH	LOC103946340	NAD(P)H-quinone oxidoreductase subunit N, chloroplastic-like	1.8624	3.0822	-
PS.lightreaction.NADH DH	LOC103946767	NAD(P)H-quinone oxidoreductase subunit M, chloroplastic-like	-	0.91397	-
PS.lightreaction.NADH DH	LOC103949228	NAD(P)H-quinone oxidoreductase subunit S, chloroplastic-like	-1.694	-1.1135	-1.4055
PS.lightreaction.NADH DH	LOC103952676	NAD(P)H-quinone oxidoreductase subunit U, chloroplastic	-	1.4746	-
PS.lightreaction.NADH DH	LOC103963151	NAD(P)H-quinone oxidoreductase subunit O, chloroplastic	-	0.91565	-
PS.lightreaction.NADH DH	LOC103963327	NAD(P)H-quinone oxidoreductase subunit N, chloroplastic-like	-	2.0137	-
PS.lightreaction.other electron carrier (ox/red).ferredoxin reductase	LOC103953478	ferredoxin--NADP reductase, leaf isozyme, chloroplastic	0.62845	2.2438	-
PS.lightreaction.other electron carrier (ox/red).ferredoxin reductase	LOC103967810	ferredoxin--NADP reductase, leaf isozyme, chloroplastic-like	-0.25413	0.94561	-
PS.photorespiration.glycolate oxydase	LOC103936200	peroxisomal (S)-2-hydroxy-acid oxidase	-	2.4674	-
PS.photorespiration.glycolate oxydase	LOC103939610	peroxisomal (S)-2-hydroxy-acid oxidase	0.86966	2.4876	0.74985
PS.photorespiration.glycolate oxydase	LOC103945960	peroxisomal (S)-2-hydroxy-acid oxidase-like	-1.1	1.1736	-
PS.photorespiration.glycolate oxydase	LOC103951291	peroxisomal (S)-2-hydroxy-acid oxidase GLO1	-1.346	-0.93295	-
PS.photorespiration.glycolate oxydase	LOC103966866	peroxisomal (S)-2-hydroxy-acid oxidase GLO4-like	-0.92107	-	-
PS.photorespiration.glycine cleavage.P subunit	LOC103952059	glycine dehydrogenase (decarboxylating), mitochondrial	0.30432	0.78916	-
PS.photorespiration.glycine cleavage.H protein	LOC103945156	glycine cleavage system H protein 2, mitochondrial	1.1605	1.1153	1.0847
PS.photorespiration.glycine cleavage.H protein	LOC103962468	glycine cleavage system H protein 3, mitochondrial-like	1.421	3.4583	1.2968
PS.photorespiration.glycine cleavage.H protein	LOC103967442	glycine cleavage system H protein 3, mitochondrial	1.7437	3.0482	1.7832
PS.photorespiration.hydroxypyruvate reductase	LOC103930425	glyoxylate/hydroxypyruvate reductase A HPR2-like	-	0.49004	-
PS.photorespiration.hydroxypyruvate reductase	LOC103930449	glyoxylate/hydroxypyruvate reductase A HPR2-like	-	0.30062	-
PS.photorespiration.hydroxypyruvate reductase	LOC103944862	glyoxylate/hydroxypyruvate reductase A HPR2-like	-3.0121	-3.2956	-2.0222
PS.photorespiration.hydroxypyruvate reductase	LOC103944894	glyoxylate/hydroxypyruvate reductase A HPR2-like	1.0224	1.7358	0.98787
PS.calvin cycle	LOC103931969	calvin cycle protein CP12-1, chloroplastic-like	-3.4198	-2.5623	-2.4468
PS.calvin cycle	LOC103961782	calvin cycle protein CP12-3, chloroplastic	-1.4549	-2.0528	-1.4235
PS.calvin cycle	LOC103967177	calvin cycle protein CP12-1, chloroplastic	-	1.1148	-
PS.calvin cycle.Rib5P Isomerase	LOC103945096	probable ribose-5-phosphate isomerase 4, chloroplastic	1.6883	1.3905	1.0896
PS.calvin cycle.Rib5P Isomerase	LOC103947052	probable ribose-5-phosphate isomerase 2	-1.1775	-1.6856	-
PS.calvin cycle.Rib5P Isomerase	LOC103948384	probable ribose-5-phosphate isomerase 2	-0.30966	-0.27773	-
PS.calvin cycle.Rib5P Isomerase	LOC103954419	probable ribose-5-phosphate isomerase 3, chloroplastic	-	2.0559	0.75393
PS.calvin cycle.PRK	LOC103938769	phosphoribulokinase, chloroplastic-like	0.45989	2.6463	-
PS.calvin cycle.PRK	LOC103962521	phosphoribulokinase, chloroplastic	-	1.1317	-
PS.calvin cycle.rubisco interacting	LOC103939553	ribulose bisphosphate carboxylase/oxygenase activase 1, chloroplastic-like	-	-1.6157	-
PS.calvin cycle.rubisco interacting	LOC103954267	ribulose bisphosphate carboxylase/oxygenase activase, chloroplastic-like	-	1.7143	-
PS.calvin cycle.rubisco interacting	LOC103955104	ribulose bisphosphate carboxylase/oxygenase activase, chloroplastic	-0.72122	0.7785	-
PS.calvin cycle.rubisco interacting	LOC103964698	ribulose bisphosphate carboxylase/oxygenase activase, chloroplastic-like	1.8114	3.5519	1.5797
PS.calvin cycle.rubisco interacting	LOC103931439	ruBisCO large subunit-binding protein subunit beta, chloroplastic-like	1.2393	1.9428	1.1757
PS.calvin cycle.rubisco interacting	LOC103947687	ruBisCO large subunit-binding protein subunit alpha	1.4502	1.9123	1.3139
PS.calvin cycle.rubisco interacting	LOC103956732	ruBisCO large subunit-binding protein subunit alpha-like	2.0363	2.7655	1.8431
PS.calvin cycle.rubisco interacting	LOC103964812	ruBisCO large subunit-binding protein subunit alpha-like	2.317	2.8947	1.9383
PS.calvin cycle.rubisco small subunit	LOC103928816	ribulose bisphosphate carboxylase small chain clone 512-like	1.0745	-	-
PS.calvin cycle.rubisco small subunit	LOC103934623	ribulose bisphosphate carboxylase small chain, chloroplastic	0.58424	4.1563	0.87116
PS.calvin cycle.rubisco small subunit	LOC103947596	ribulose bisphosphate carboxylase small chain, chloroplastic-like	2.1746	3.4503	-
PS.calvin cycle.rubisco small subunit	LOC103948502	ribulose bisphosphate carboxylase small chain, chloroplastic-like	-	5.082	-
PS.calvin cycle.aldolase	LOC103937074	fructose-bisphosphate aldolase 1, chloroplastic-like	1.2537	3.743	1.3351
PS.calvin cycle.aldolase	LOC103944293	fructose-bisphosphate aldolase 1, cytoplasmic	0.53605	1.2093	0.82215
PS.calvin cycle.aldolase	LOC103947077	fructose-bisphosphate aldolase 3, chloroplastic-like	-0.46138	-	-
PS.calvin cycle.aldolase	LOC103948139	fructose-bisphosphate aldolase 3, chloroplastic-like	-	-0.41016	-
PS.calvin cycle.aldolase	LOC103954793	fructose-bisphosphate aldolase 1, cytoplasmic-like	-	2.1233	-
PS.calvin cycle.aldolase	LOC103955182	fructose-bisphosphate aldolase, cytoplasmic isozyme	0.39781	0.56017	-
PS.calvin cycle.aldolase	LOC103955183	fructose-bisphosphate aldolase 1, cytoplasmic-like	0.86303	0.92169	0.81824
PS.calvin cycle.aldolase	LOC103966935	fructose-bisphosphate aldolase 1, chloroplastic	1.0842	3.3706	1.2127
PS.calvin cycle.FBPase	LOC103935582	fructose-1,6-bisphosphatase, cytosolic-like	-2.8254	-2.6029	-1.945
PS.calvin cycle.FBPase	LOC103949429	fructose-1,6-bisphosphatase, chloroplastic-like	2.0651	4.0171	1.9398
PS.calvin cycle.FBPase	LOC103956105	fructose-1,6-bisphosphatase, chloroplastic	-0.41946	-	-
PS.calvin cycle.FBPase	LOC103958011	fructose-1,6-bisphosphatase, cytosolic	-0.69524	-	-1.0226
PS.calvin cycle.FBPase	LOC103959613	fructose-1,6-bisphosphatase, chloroplastic-like	-	3.8842	-
PS.calvin cycle.FBPase	LOC103959618	fructose-1,6-bisphosphatase, chloroplastic-like	3.0989	4.7391	-
PS.calvin cycle.TPI	LOC103930334	triosephosphate isomerase, chloroplastic-like	-	1.4837	-
PS.calvin cycle.TPI	LOC103930335	triosephosphate isomerase, chloroplastic-like	1.2005	1.4924	-
PS.calvin cycle.TPI	LOC103935459	triosephosphate isomerase, cytosolic	0.70544	1.0913	-
PS.calvin cycle.TPI	LOC103938349	triosephosphate isomerase, chloroplastic	1.7295	2.5997	1.6971
PS.calvin cycle.TPI	LOC103944912	triosephosphate isomerase, cytosolic	-1.7267	-2.1741	-1.0875
PS.calvin cycle.TPI	LOC103948425	triosephosphate isomerase, cytosolic-like	0.21184	0.7496	-
PS.calvin cycle.TPI	LOC103958482	triosephosphate isomerase, chloroplastic-like	-	1.5028	-
PS.calvin cycle.GAP	LOC103929122	glyceraldehyde-3-phosphate dehydrogenase, cytosolic-like	-1.3465	-1.6978	-1.0512
PS.calvin cycle.GAP	LOC103936989	glyceraldehyde-3-phosphate dehydrogenase A, chloroplastic	0.51919	3.0999	0.76666
PS.calvin cycle.GAP	LOC103941710	glyceraldehyde-3-phosphate dehydrogenase GAPCP1, chloroplastic-like	0.39391	1.1593	0.76629
PS.calvin cycle.GAP	LOC103949900	glyceraldehyde-3-phosphate dehydrogenase, cytosolic	0.51272	0.58803	0.54997
PS.calvin cycle.GAP	LOC103955971	NADP-dependent glyceraldehyde-3-phosphate dehydrogenase	0.50133	1.9906	0.7739
PS.calvin cycle.GAP	LOC103961743	glyceraldehyde-3-phosphate dehydrogenase B, chloroplastic	1.4908	4.4728	1.5074
PS.calvin cycle.GAP	LOC103966613	glyceraldehyde-3-phosphate dehydrogenase A, chloroplastic	0.70581	2.194	-
PS.calvin cycle.seduheptulose bisphosphatase	LOC103933754	sedoheptulose-1,7-bisphosphatase, chloroplastic-like	2.1285	2.7132	1.6462
PS.calvin cycle.seduheptulose bisphosphatase	LOC103936339	sedoheptulose-1,7-bisphosphatase, chloroplastic-like	-0.51371	-	-0.76687
PS.calvin cycle.seduheptulose bisphosphatase	LOC103942540	sedoheptulose-1,7-bisphosphatase, chloroplastic-like	-	1.0772	-
PS.calvin cycle.seduheptulose bisphosphatase	LOC103952026	sedoheptulose-1,7-bisphosphatase, chloroplastic-like	1.7861	3.1524	1.4633
cell wall.precursor synthesis.UXS	LOC103928376	UDP-glucuronic acid decarboxylase 2-like	1.2485	1.3895	1.1468
cell wall.precursor synthesis.UXS	LOC103928424	UDP-glucuronic acid decarboxylase 2	1.1878	1.2807	1.0481
cell wall.precursor synthesis.UXS	LOC103930040	UDP-glucuronic acid decarboxylase 5-like	0.50744	1.1278	0.65119
cell wall.precursor synthesis.UXS	LOC103933672	UDP-glucuronic acid decarboxylase 1-like	-	0.64252	0.30142
cell wall.precursor synthesis.UXS	LOC103940426	UDP-glucuronic acid decarboxylase 2-like	0.62849	1.2523	0.75619
cell wall.precursor synthesis.UXS	LOC103943668	UDP-glucuronic acid decarboxylase 4-like	1.8225	-	1.4579
cell wall.precursor synthesis.UXS	LOC103944949	UDP-glucuronic acid decarboxylase 6	-0.50002	0.90159	0.26077
cell wall.precursor synthesis.UXS	LOC103948402	UDP-glucuronic acid decarboxylase 5	0.28717	0.54619	0.28092
cell wall.precursor synthesis.UXS	LOC103948978	UDP-glucuronic acid decarboxylase 6	-0.35396	0.41471	0.060406
cell wall.precursor synthesis.UXS	LOC103963541	UDP-glucuronic acid decarboxylase 1-like	0.26594	0.75831	0.1566
cell wall.cell wall protei-.AGPs.AGP	LOC103927831	fasciclin-like arabinogalactan protein 12	-	1.6415	1.5619
cell wall.cell wall protei-.AGPs.AGP	LOC103930626	fasciclin-like arabinogalactan protein 12	2.3584	-	1.568
cell wall.cell wall protei-.AGPs.AGP	LOC103933445	fasciclin-like arabinogalactan protein 4	1.135	0.68562	0.12445
cell wall.cell wall protei-.AGPs.AGP	LOC103934731	fasciclin-like arabinogalactan protein 11	-	1.7465	1.3675
cell wall.cell wall protei-.AGPs.AGP	LOC103940249	fasciclin-like arabinogalactan protein 16	0.66747	0.71646	0.33928
cell wall.cell wall protei-.AGPs.AGP	LOC103942779	fasciclin-like arabinogalactan protein 2	0.94576	2.1649	0.69717
cell wall.cell wall protei-.AGPs.AGP	LOC103944928	fasciclin-like arabinogalactan protein 4	1.5506	1.3262	1.3031
cell wall.cell wall protei-.AGPs.AGP	LOC103952717	fasciclin-like arabinogalactan protein 16	1.2762	1.2262	1.0571
cell wall.cell wall protei-.AGPs.AGP	LOC103953566	fasciclin-like arabinogalactan protein 14	-1.267	-6.0001	-2.1851
cell wall.cell wall protei-.AGPs.AGP	LOC103953567	fasciclin-like arabinogalactan protein 14	-1.4147	-5.2088	-2.0834
cell wall.cell wall protei-.AGPs.AGP	LOC103955034	fasciclin-like arabinogalactan protein 7	1.2235	1.5724	1.0747
cell wall.cell wall protei-.AGPs.AGP	LOC103963913	fasciclin-like arabinogalactan protein 1	1.5546	1.8013	1.5317
cell wall.cell wall protei-.AGPs.AGP	LOC103965978	fasciclin-like arabinogalactan protein 3	-0.79635	-5.1221	-1.8973
cell wall.cell wall protei-.AGPs.AGP	LOC103967710	fasciclin-like arabinogalactan protein 8	1.7626	2.1058	1.6289
cell wall.cell wall protei-	LOC103939075	SNF1-related protein kinase regulatory subunit gamma-like PV42a	-3.986	-5.0236	-2.7888
cell wall.cell wall protei-	LOC103950016	SNF1-related protein kinase regulatory subunit gamma-1-like	-2.5629	-3.9443	-1.8056
cell wall.cell wall protei-	LOC103950862	SNF1-related protein kinase regulatory subunit gamma-1-like	1.1189	-	0.47023
cell wall.cell wall protei-	LOC103955285	SNF1-related protein kinase regulatory subunit gamma-like PV42a	#NAME?	-3.9118	-2.355
cell wall.cell wall protei-	LOC103958023	SNF1-related protein kinase regulatory subunit gamma-1-like	-2.0071	-3.7131	-1.7434
cell wall.cell wall protei-	LOC103964056	SNF1-related protein kinase regulatory subunit gamma-1-like	-1.7285	-4.0821	-2.0006
major CHO metabolism.synthesis.starch.AGPase	LOC103928707	glucose-1-phosphate adenylyltransferase large subunit, chloroplastic/amyloplastic	0.66139	-	0.20514
major CHO metabolism.synthesis.starch.AGPase	LOC103930811	glucose-1-phosphate adenylyltransferase large subunit 3, chloroplastic/amyloplastic	2.2044	3.0669	1.9772
major CHO metabolism.synthesis.starch.AGPase	LOC103934640	glucose-1-phosphate adenylyltransferase large subunit 1-like	0.6608	1.0791	0.65389
major CHO metabolism.synthesis.starch.AGPase	LOC103936905	glucose-1-phosphate adenylyltransferase large subunit 1, chloroplastic	2.6973	5.5379	1.9538
major CHO metabolism.synthesis.starch.AGPase	LOC103937447	glucose-1-phosphate adenylyltransferase large subunit 1-like	0.71228	1.0447	0.65338
major CHO metabolism.synthesis.starch.AGPase	LOC103954124	glucose-1-phosphate adenylyltransferase large subunit 3, chloroplastic/amyloplastic-like	3.6259	5.8507	2.2626
major CHO metabolism.synthesis.starch.AGPase	LOC103967117	glucose-1-phosphate adenylyltransferase large subunit 1-like	-0.88575	-0.33059	-0.57478
major CHO metabolism.synthesis.starch.starch synthase	LOC103935950	granule-bound starch synthase 1, chloroplastic/amyloplastic-like	-0.93209	-1.7495	-0.90576
major CHO metabolism.synthesis.starch.starch synthase	LOC103943441	starch synthase 1, chloroplastic/amyloplastic-like	-2.1155	-1.0903	-1.4449
major CHO metabolism.synthesis.starch.starch synthase	LOC103948046	starch synthase 1, chloroplastic/amyloplastic-like	-1.4355	-1.0419	-1.0924
major CHO metabolism.synthesis.starch.starch synthase	LOC103948179	starch synthase 3, chloroplastic/amyloplastic-like	-1.2917	-1.18	-1.0651
major CHO metabolism.synthesis.starch.starch synthase	LOC103950521	starch synthase 3, chloroplastic/amyloplastic-like	-1.2328	-0.89811	-0.95012
major CHO metabolism.synthesis.starch.starch synthase	LOC103950708	granule-bound starch synthase 1, chloroplastic/amyloplastic-like	-2.1544	0.48158	-0.011535
major CHO metabolism.synthesis.starch.starch synthase	LOC103951060	granule-bound starch synthase 2, chloroplastic/amyloplastic-like	-0.86995	-0.20023	0.90225
major CHO metabolism.synthesis.starch.starch synthase	LOC103951254	probable starch synthase 4, chloroplastic/amyloplastic	-1.1453	-1.4609	-1.2203
major CHO metabolism.synthesis.starch.starch synthase	LOC103956358	granule-bound starch synthase 1, chloroplastic/amyloplastic-like	-0.32486	-0.49411	-0.20176
major CHO metabolism.synthesis.starch.starch synthase	LOC103958150	starch synthase 1, chloroplastic/amyloplastic-like	-1.7958	-1.0196	-1.2746
major CHO metabolism.synthesis.starch.starch synthase	LOC103964984	granule-bound starch synthase 2, chloroplastic/amyloplastic-like	0.37371	0.83641	0.83362
major CHO metabolism.degradation.sucrose.fructokinase	LOC103927248	probable fructokinase-6, chloroplastic	-0.24417	-	-0.13427
major CHO metabolism.degradation.sucrose.fructokinase	LOC103933335	probable fructokinase-7	-1.2185	-1.0016	-0.7683
major CHO metabolism.degradation.sucrose.fructokinase	LOC103946069	probable fructokinase-1	0.95176	0.68714	0.43192
major CHO metabolism.degradation.sucrose.fructokinase	LOC103947270	fructokinase-like 2, chloroplastic	1.5168	1.8071	1.3084
major CHO metabolism.degradation.sucrose.fructokinase	LOC103949435	fructokinase-like 1, chloroplastic	1.0799	1.7975	0.77312
major CHO metabolism.degradation.sucrose.fructokinase	LOC103957305	probable fructokinase-1	-	1.4505	0.35244
major CHO metabolism.degradation.sucrose.fructokinase	LOC103959638	fructokinase-like 1, chloroplastic	1.545	1.9436	1.2628
major CHO metabolism.degradation.sucrose.fructokinase	LOC103960497	probable fructokinase-7	-0.79137	-0.86467	-0.53146
major CHO metabolism.degradation.sucrose.fructokinase	LOC103961015	probable fructokinase-6, chloroplastic	0.77136	-	0.50591
major CHO metabolism.degradation.sucrose.fructokinase	LOC103964630	probable fructokinase-7	-	-5.3526	-2.431
cell wall.precursor synthesis.phosphomannose isomerase	LOC103934628	mannose-6-phosphate isomerase 1-like	-	1.2848	1.2845
cell wall.precursor synthesis.phosphomannose isomerase	LOC103937460	mannose-6-phosphate isomerase 1-like	1.3231	1.3737	1.2989
cell wall.precursor synthesis.phosphomannose isomerase	LOC103947117	mannose-6-phosphate isomerase 1-like	0.92075	1.7499	0.97371
cell wall.precursor synthesis.phosphomannose isomerase	LOC103948500	mannose-6-phosphate isomerase 1-like	-	1.3651	0.85593
cell wall.precursor synthesis.sugar kinases.galacturonic acid kinase	LOC103933775	galacturonokinase-like	-	0.54915	0.25916
cell wall.precursor synthesis.sugar kinases.galacturonic acid kinase	LOC103934801	galacturonokinase-like	-	1.9401	1.0521
cell wall.precursor synthesis.sugar kinases.galacturonic acid kinase	LOC103938402	galacturonokinase-like	0.72524	1.9575	1.0104
cell wall.precursor synthesis.sugar kinases.galacturonic acid kinase	LOC103939519	galacturonokinase-like	-	0.49277	0.19062
major CHO metabolism.degradation.starch.tra-porter	LOC103940517	maltose excess protein 1-like, chloroplastic	0.65861	0.91105	0.55395
major CHO metabolism.degradation.starch.tra-porter	LOC103951475	maltose excess protein 1-like, chloroplastic	-1.9857	-1.3795	-1.5514
major CHO metabolism.degradation.starch.tra-porter	LOC103936023	triose phosphate/phosphate translocator, chloroplastic-like	0.60229	1.6271	0.81987
major CHO metabolism.degradation.starch.tra-porter	LOC103944162	triose phosphate/phosphate translocator, chloroplastic	-0.52368	-	-0.7184
major CHO metabolism.degradation.starch.tra-porter	LOC103953007	triose phosphate/phosphate translocator, non-green plastid, chloroplastic	0.58445	1.5761	0.85426
major CHO metabolism.degradation.starch.tra-porter	LOC103930441	probable plastidic glucose transporter 3	2.9809	-	3.2665
major CHO metabolism.degradation.starch.tra-porter	LOC103944852	probable plastidic glucose transporter 3	-	1.4895	0.6904
major CHO metabolism.degradation.starch.tra-porter	LOC103948491	plastidic glucose transporter 4	-	2.5602	0.68113
major CHO metabolism.degradation.starch.tra-porter	LOC103960682	probable plastidic glucose transporter 2	-1.4265	-1.9744	-1.085
major CHO metabolism.degradation.starch.tra-porter	LOC103962987	probable plastidic glucose transporter 2	-0.67548	-0.74734	-0.46454
major CHO metabolism.degradation.starch.glucan water dikinase	LOC103949794	alpha-glucan water dikinase, chloroplastic	-	-	0.11374
major CHO metabolism.degradation.starch.glucan water dikinase	LOC103960380	phosphoglucan, water dikinase, chloroplastic	-0.85339	-1.0042	-0.72207
major CHO metabolism.degradation.starch.starch phosphorylase	LOC103951000	alpha-1,4 glucan phosphorylase L isozyme, chloroplastic/amyloplastic-like	-0.43796	0.31428	-0.13815
major CHO metabolism.degradation.starch.starch phosphorylase	LOC103955779	alpha-glucan phosphorylase 1-like	-0.15642	-0.38844	-0.18458
major CHO metabolism.degradation.starch.starch cleavage.beta amylase	LOC103933465	beta-amylase-like	-0.30484	-	0.042787
major CHO metabolism.degradation.starch.starch cleavage.beta amylase	LOC103935363	beta-amylase 1, chloroplastic-like	-0.36017	-2.1686	-1.2335
major CHO metabolism.degradation.starch.starch cleavage.beta amylase	LOC103935932	beta-amylase 3, chloroplastic-like	-	0.83988	0.50947
major CHO metabolism.degradation.starch.starch cleavage.beta amylase	LOC103938271	inactive beta-amylase 4, chloroplastic-like	-	-0.30081	-0.14649
major CHO metabolism.degradation.starch.starch cleavage.beta amylase	LOC103938383	inactive beta-amylase 9-like	-2.574	-3.0546	-2.0408
major CHO metabolism.degradation.starch.starch cleavage.beta amylase	LOC103938388	inactive beta-amylase 9-like	-2.315	-2.7623	-1.8843
major CHO metabolism.degradation.starch.starch cleavage.beta amylase	LOC103941625	beta-amylase 1, chloroplastic	-1.6673	-2.5095	-1.3896
major CHO metabolism.degradation.starch.starch cleavage.beta amylase	LOC103943613	inactive beta-amylase 9-like	-2.4734	-2.838	-2.035
major CHO metabolism.degradation.starch.starch cleavage.beta amylase	LOC103949204	beta-amylase 2, chloroplastic-like	-	-0.89753	-0.6368
major CHO metabolism.degradation.starch.starch cleavage.beta amylase	LOC103949270	beta-amylase 1, chloroplastic-like	-0.37768	-0.40686	-0.2342
major CHO metabolism.degradation.starch.starch cleavage.beta amylase	LOC103955548	beta-amylase 8	-0.3829	-0.23225	-0.43072
major CHO metabolism.degradation.starch.starch cleavage.beta amylase	LOC103957428	beta-amylase 2, chloroplastic-like	0.34472	0.9895	0.65927
major CHO metabolism.degradation.starch.starch cleavage.beta amylase	LOC103958554	inactive beta-amylase 9-like	-2.6637	-4.5284	-2.3825
major CHO metabolism.degradation.starch.starch cleavage.beta amylase	LOC103961073	beta-amylase 3, chloroplastic	-3.6717	-0.9574	-1.5205
cell wall.precursor synthesis.RHM	LOC103947467	trifunctional UDP-glucose 4,6-dehydratase/UDP-4-keto-6-deoxy-D-glucose 3,5-epimerase/UDP-4-keto-L-rhamnose-reductase RHM2-like	2.2674	2.8924	2.1898
cell wall.precursor synthesis.RHM	LOC103947469	trifunctional UDP-glucose 4,6-dehydratase/UDP-4-keto-6-deoxy-D-glucose 3,5-epimerase/UDP-4-keto-L-rhamnose-reductase RHM1-like	0.4012	0.65974	0.49339
cell wall.precursor synthesis.RHM	LOC103947522	trifunctional UDP-glucose 4,6-dehydratase/UDP-4-keto-6-deoxy-D-glucose 3,5-epimerase/UDP-4-keto-L-rhamnose-reductase RHM2-like	-	-2.002	-1.9014
cell wall.precursor synthesis.RHM	LOC103965391	trifunctional UDP-glucose 4,6-dehydratase/UDP-4-keto-6-deoxy-D-glucose 3,5-epimerase/UDP-4-keto-L-rhamnose-reductase RHM1	0.25024	0.56655	0.58591
cell wall.precursor synthesis.RHM	LOC103966239	trifunctional UDP-glucose 4,6-dehydratase/UDP-4-keto-6-deoxy-D-glucose 3,5-epimerase/UDP-4-keto-L-rhamnose-reductase RHM1-like	0.59015	1.5205	0.98278
cell wall.precursor synthesis.UER	LOC103938392	bifunctional dTDP-4-dehydrorhamnose 3,5-epimerase/dTDP-4-dehydrorhamnose reductase-like	-0.80447	-	-0.40091
cell wall.precursor synthesis.UER	LOC103938400	bifunctional dTDP-4-dehydrorhamnose 3,5-epimerase/dTDP-4-dehydrorhamnose reductase-like	-0.82195	-	-0.45033
cell wall.precursor synthesis.UER	LOC103952887	bifunctional dTDP-4-dehydrorhamnose 3,5-epimerase/dTDP-4-dehydrorhamnose reductase	-1.1595	-0.73239	-0.72277
cell wall.precursor synthesis.UER	LOC103966453	bifunctional dTDP-4-dehydrorhamnose 3,5-epimerase/dTDP-4-dehydrorhamnose reductase-like	-	1.2814	0.69561
cell wall.precursor synthesis.UER	LOC103966464	bifunctional dTDP-4-dehydrorhamnose 3,5-epimerase/dTDP-4-dehydrorhamnose reductase-like	-	0.90855	0.35051
cell wall.precursor synthesis.KDO pathway.arabinose-5-phosphate isomerase	LOC103928782	probable arabinose 5-phosphate isomerase	-	0.7603	0.27134
cell wall.precursor synthesis.KDO pathway.arabinose-5-phosphate isomerase	LOC103958875	probable arabinose 5-phosphate isomerase	-0.47211	0.56938	0.24853
cell wall.precursor synthesis.KDO pathway.KDO-8-Phosphate Synthase	LOC103940960	2-dehydro-3-deoxyphosphooctonate aldolase	0.6586	1.2997	0.65675
cell wall.precursor synthesis.KDO pathway.KDO-8-Phosphate Synthase	LOC103953328	2-dehydro-3-deoxyphosphooctonate aldolase-like	0.74634	2.1097	0.91197
cell wall.precursor synthesis.NDP sugar pyrophosphorylase.multiple NDP-Sugars	LOC103945204	UDP-sugar pyrophosphorylase	-2.0069	-2.3479	-1.6142
cell wall.precursor synthesis.NDP sugar pyrophosphorylase.multiple NDP-Sugars	LOC103946766	UDP-sugar pyrophosphorylase-like	-2.1875	-2.376	-1.6528
cell wall.precursor synthesis.UGE	LOC103933914	UDP-glucose 4-epimerase GEPI48-like	1.3073	1.1436	0.8657
cell wall.precursor synthesis.UGE	LOC103937245	bifunctional UDP-glucose 4-epimerase and UDP-xylose 4-epimerase 1	-5.0728	-6.3532	-2.7805
cell wall.precursor synthesis.UGE	LOC103949238	UDP-glucose 4-epimerase GEPI48-like	-3.3795	-4.3032	-2.1001
ell wall.precursor synthesis.sugar kinases.arabinose-1-kinase	LOC103957512	L-arabinokinase-like	-	-0.50713	-0.42944
ell wall.precursor synthesis.sugar kinases.arabinose-1-kinase	LOC103964520	L-arabinokinase-like	-3.5399	-5.6147	-2.561
cell wall.precursor synthesis.UDP-Glc dehydrogenase (UGD)	LOC103930880	UDP-glucose 6-dehydrogenase 5-like	0.92921	1.7228	1.3888
cell wall.precursor synthesis.UDP-Glc dehydrogenase (UGD)	LOC103931361	UDP-glucose 6-dehydrogenase 5	-	1.4992	1.3243
cell wall.precursor synthesis.UDP-Glc dehydrogenase (UGD)	LOC103947238	UDP-glucose 6-dehydrogenase 5	0.3636	1.1142	1.0461
cell wall.precursor synthesis.MUR4	LOC103945087	UDP-arabinose 4-epimerase 1	-	0.84206	0.25463
cell wall.precursor synthesis.MUR4	LOC103952320	UDP-arabinose 4-epimerase 1-like	0.28914	0.98423	0.67528
cell wall.precursor synthesis.MUR4	LOC103964163	UDP-arabinose 4-epimerase 1-like	-1.1791	-1.5424	-1.0123
cell wall.precursor synthesis.MUR4	LOC103966512	UDP-arabinose 4-epimerase 1-like	2.1215	1.6459	1.6163
cell wall.precursor synthesis	LOC103932429	UDP-N-acetylglucosamine diphosphorylase 1-like	-0.48052	-	-0.077351
cell wall.precursor synthesis.AXS	LOC103929854	UDP-D-apiose/UDP-D-xylose synthase 2-like	0.30562	0.78834	0.74076
cell wall.precursor synthesis.AXS	LOC103954739	UDP-D-apiose/UDP-D-xylose synthase 2	0.72924	0.91928	0.87086
cell wall.precursor synthesis.GMD	LOC103966717	GDP-mannose 4,6 dehydratase 1	0.90952	1.3187	1.07
cell wall.precursor synthesis.GER	LOC103964461	putative GDP-L-fucose synthase 2	0.69548	0.66231	0.65278
cell wall.cellulose synthesis	LOC103926827	probable xyloglucan glycosyltransferase 5	0.40249	1.6404	1.3447
cell wall.cellulose synthesis	LOC103931733	probable xyloglucan glycosyltransferase 5	0.85117	2.3145	1.1726
cell wall.cellulose synthesis	LOC103936438	xyloglucan glycosyltransferase 4-like	2.4414	-	2.9177
cell wall.cellulose synthesis	LOC103939640	xyloglucan glycosyltransferase 4-like	2.5118	1.3699	1.9234
cell wall.cellulose synthesis	LOC103940681	probable xyloglucan glycosyltransferase 6	0.90946	0.8737	0.67857
cell wall.cellulose synthesis	LOC103941405	xyloglucan glycosyltransferase 4-like	2.0095	-	1.4495
cell wall.cellulose synthesis	LOC103942015	probable xyloglucan glycosyltransferase 5	0.48006	1.7377	1.3402
cell wall.cellulose synthesis	LOC103944565	probable xyloglucan glycosyltransferase 5	1.6175	1.6555	1.3899
cell wall.cellulose synthesis	LOC103944582	probable xyloglucan glycosyltransferase 5	1.751	2.196	1.6399
cell wall.cellulose synthesis	LOC103951542	probable xyloglucan glycosyltransferase 12	1.2518	1.2463	0.81671
cell wall.cellulose synthesis	LOC103961386	probable xyloglucan glycosyltransferase 6	-0.5436	-0.56638	-0.42482
cell wall.cellulose synthesis	LOC103927870	glucomannan 4-beta-mannosyltransferase 9-like	-	2.6091	2.5577
cell wall.cellulose synthesis	LOC103929863	glucomannan 4-beta-mannosyltransferase 2-like	0.91057	1.5664	1.0127
cell wall.cellulose synthesis	LOC103944311	glucomannan 4-beta-mannosyltransferase 9-like	1.987	1.9379	1.5507
cell wall.cellulose synthesis	LOC103954749	glucomannan 4-beta-mannosyltransferase 2-like	1.078	1.9344	1.2237
cell wall.cellulose synthesis	LOC103955162	glucomannan 4-beta-mannosyltransferase 9-like	1.7466	2.2937	1.1154
cell wall.cellulose synthesis	LOC103927919	endoglucanase 2	-	1.6877	0.65119
cell wall.cellulose synthesis	LOC103928398	endoglucanase 17-like	-	2.1688	0.57181
cell wall.cellulose synthesis	LOC103929653	endoglucanase 16-like	-	-4.4098	-1.8593
cell wall.cellulose synthesis	LOC103931993	endoglucanase 9-like	-1.2839	-3.5389	-1.3861
cell wall.cellulose synthesis	LOC103935785	endoglucanase 20-like	-5.2893	-7.4935	-3.8955
cell wall.cellulose synthesis	LOC103938177	endoglucanase 6-like	1.3236	2.2267	0.86593
cell wall.cellulose synthesis	LOC103943206	endoglucanase 5	1.8105	-	0.5572
cell wall.cellulose synthesis	LOC103949220	endoglucanase 6-like	0.86228	2.1006	1.1584
cell wall.cellulose synthesis	LOC103950695	endoglucanase CX-like	-	4.4945	1.088
cell wall.cellulose synthesis	LOC103952871	endoglucanase 16-like	-	-3.0868	-2.6707
cell wall.cellulose synthesis	LOC103953375	endoglucanase 20-like	-4.6993	-6.8843	-2.8527
cell wall.cellulose synthesis	LOC103954973	endoglucanase 11	-	1.9053	0.77561
cell wall.cellulose synthesis	LOC103956569	endoglucanase 9	-	2.7914	2.0005
cell wall.cellulose synthesis	LOC103966933	endoglucanase 24-like	-	2.1606	0.31604
cell wall.cellulose synthesis	LOC103967200	endoglucanase 17	-	2.3324	1.7795
cell wall.cellulose synthesis	LOC103931678	cellulose synthase A catalytic subunit 2 [UDP-forming]-like	0.2457	1.0486	0.56044
cell wall.cellulose synthesis	LOC103940242	cellulose synthase A catalytic subunit 1 [UDP-forming]	-0.3457	-	-0.15128
cell wall.cellulose synthesis	LOC103942164	cellulose synthase A catalytic subunit 2 [UDP-forming]-like	-1.8773	-2.5665	-1.9244
cell wall.cellulose synthesis	LOC103943043	cellulose synthase A catalytic subunit 8 [UDP-forming]	1.6138	2.2311	2.0642
cell wall.cellulose synthesis	LOC103944068	cellulose synthase A catalytic subunit 8 [UDP-forming]-like	1.7914	1.9562	2.0903
cell wall.cellulose synthesis	LOC103945881	cellulose synthase A catalytic subunit 3 [UDP-forming]-like	-	0.37471	0.091862
cell wall.cellulose synthesis	LOC103946683	cellulose synthase A catalytic subunit 1 [UDP-forming]	-0.34292	-	-0.28944
cell wall.cellulose synthesis	LOC103949047	cellulose synthase A catalytic subunit 7 [UDP-forming]-like	-	1.0298	1.4158
cell wall.cellulose synthesis	LOC103954859	cellulose synthase A catalytic subunit 3 [UDP-forming]	-0.67084	-	-0.30102
cell wall.cellulose synthesis	LOC103956004	cellulose synthase A catalytic subunit 7 [UDP-forming]	1.252	1.5709	1.4916
cell wall.cellulose synthesis	LOC103958831	cellulose synthase A catalytic subunit 4 [UDP-forming]-like	1.9413	1.7256	2.0339
cell wall.cellulose synthesis	LOC103959701	cellulose synthase A catalytic subunit 4 [UDP-forming]	2.0243	1.9974	2.3923
cell wall.cellulose synthesis	LOC103961795	probable cellulose synthase A catalytic subunit 5 [UDP-forming]	-1.4844	-4.4247	-1.3489
cell wall.cellulose synthesis	LOC103965250	cellulose synthase A catalytic subunit 2 [UDP-forming]-like	1.1977	1.4571	1.1436
cell wall.cellulose synthesis	LOC103926630	MLO-like protein 6	-2.4666	-2.331	-1.9347
cell wall.cellulose synthesis	LOC103927825	MLO-like protein 6	-1.9831	-1.3351	-0.83319
cell wall.cellulose synthesis	LOC103934665	MLO-like protein 6	-	-3.0544	-1.7688
cell wall.cellulose synthesis	LOC103938728	MLO-like protein 6	0.77944	-0.83431	0.18836
cell wall.cellulose synthesis	LOC103944153	MLO-like protein 6	-2.2287	1.1403	1.6905
cell wall.cellulose synthesis	LOC103950182	MLO-like protein 8	1.6497	-	1.3885
cell wall.cellulose synthesis	LOC103956058	MLO-like protein 1	-1.2316	-2.41	-0.61911
cell wall.cellulose synthesis	LOC103959161	MLO-like protein 8	-0.70964	-0.88403	-0.045329
cell wall.cellulose synthesis	LOC103963314	MLO-like protein 15	-1.328	-1.5879	-1.5669
cell wall.cellulose synthesis	LOC103965015	MLO-like protein 1	-	-4.256	-2.8031
cell wall.cellulose synthesis	LOC103967797	MLO-like protein 4	-	0.82131	0.46593
cell wall.cellulose synthesis.cellulose synthase	LOC103931678	cellulose synthase A catalytic subunit 2 [UDP-forming]-like	0.2457	1.0486	0.56044
cell wall.cellulose synthesis.cellulose synthase	LOC103933896	cellulose synthase-like protein G3	2.2863	2.257	2.1212
cell wall.cellulose synthesis.cellulose synthase	LOC103936880	cellulose synthase-like protein G2	-2.342	-2.9983	-1.3311
cell wall.cellulose synthesis.cellulose synthase	LOC103938817	cellulose synthase-like protein H1	-	3.8402	1.2991
cell wall.cellulose synthesis.cellulose synthase	LOC103940242	cellulose synthase A catalytic subunit 1 [UDP-forming]	-0.3457	-	-0.15128
cell wall.cellulose synthesis.cellulose synthase	LOC103940701	cellulose synthase-like protein E2	-	-1.6785	-0.40372
cell wall.cellulose synthesis.cellulose synthase	LOC103940710	cellulose synthase-like protein E6	1.0634	-	0.39385
cell wall.cellulose synthesis.cellulose synthase	LOC103942164	cellulose synthase A catalytic subunit 2 [UDP-forming]-like	-1.8773	-2.5665	-1.9244
cell wall.cellulose synthesis.cellulose synthase	LOC103943043	cellulose synthase A catalytic subunit 8 [UDP-forming]	1.6138	2.2311	2.0642
cell wall.cellulose synthesis.cellulose synthase	LOC103943290	cellulose synthase-like protein D3	-	0.18201	-0.19147
cell wall.cellulose synthesis.cellulose synthase	LOC103944068	cellulose synthase A catalytic subunit 8 [UDP-forming]-like	1.7914	1.9562	2.0903
cell wall.cellulose synthesis.cellulose synthase	LOC103945881	cellulose synthase A catalytic subunit 3 [UDP-forming]-like	-	0.37471	0.091862
cell wall.cellulose synthesis.cellulose synthase	LOC103946683	cellulose synthase A catalytic subunit 1 [UDP-forming]	-0.34292	-	-0.28944
cell wall.cellulose synthesis.cellulose synthase	LOC103949047	cellulose synthase A catalytic subunit 7 [UDP-forming]-like	-	1.0298	1.4158
cell wall.cellulose synthesis.cellulose synthase	LOC103951502	cellulose synthase-like protein D3	0.82569	0.59214	0.49918
cell wall.cellulose synthesis.cellulose synthase	LOC103954859	cellulose synthase A catalytic subunit 3 [UDP-forming]	-0.67084	-	-0.30102
cell wall.cellulose synthesis.cellulose synthase	LOC103956004	cellulose synthase A catalytic subunit 7 [UDP-forming]	1.252	1.5709	1.4916
cell wall.cellulose synthesis.cellulose synthase	LOC103958831	cellulose synthase A catalytic subunit 4 [UDP-forming]-like	1.9413	1.7256	2.0339
cell wall.cellulose synthesis.cellulose synthase	LOC103959701	cellulose synthase A catalytic subunit 4 [UDP-forming]	2.0243	1.9974	2.3923
cell wall.cellulose synthesis.cellulose synthase	LOC103961795	probable cellulose synthase A catalytic subunit 5 [UDP-forming]	-1.4844	-4.4247	-1.3489
cell wall.cellulose synthesis.cellulose synthase	LOC103965250	cellulose synthase A catalytic subunit 2 [UDP-forming]-like	1.1977	1.4571	1.1436
cell wall.cellulose synthesis.cellulose synthase	LOC108865360	cellulose synthase-like protein E1	-0.75069	-1.4608	-0.73736
cell wall.cellulose synthesis.COBRA	LOC103930406	protein COBRA-like	-	0.94103	0.41232
cell wall.cellulose synthesis.COBRA	LOC103937916	COBRA-like protein 4	1.5302	1.3207	1.5774
cell wall.cellulose synthesis.COBRA	LOC103937925	protein COBRA-like	-0.57962	-	-0.32342
cell wall.cellulose synthesis.COBRA	LOC103939406	COBRA-like protein 7	0.73636	-	0.28526
cell wall.cellulose synthesis.COBRA	LOC103946457	COBRA-like protein 6	2.7228	2.1042	2.2408
cell wall.cellulose synthesis.COBRA	LOC103948775	COBRA-like protein 10	-1.3555	-3.8844	-2.3163
cell wall.cellulose synthesis.COBRA	LOC103959344	COBRA-like protein 7	0.66924	-	-0.0026031
cell wall.cellulose synthesis.COBRA	LOC103962746	COBRA-like protein 4	4.583	-	3.7025
cell wall.cellulose synthesis.COBRA	LOC103962747	COBRA-like protein 1	-0.85743	-0.87433	0.1264
cell wall.cellulose synthesis.COBRA	LOC103967300	COBRA-like protein 10	-1.4612	-3.9318	-1.9113
cell wall.hemicellulose synthesis	LOC103928879	hydroxyproline O-galactosyltransferase HPGT1-like	-	0.68805	0.15952
cell wall.hemicellulose synthesis	LOC103941415	hydroxyproline O-galactosyltransferase GALT3	-	-1.3935	0.090778
cell wall.hemicellulose synthesis	LOC103943734	hydroxyproline O-galactosyltransferase HPGT1-like	-0.3589	-0.61175	-0.46577
cell wall.hemicellulose synthesis	LOC103950900	hydroxyproline O-galactosyltransferase GALT6-like	1.2127	1.397	1.0312
cell wall.hemicellulose synthesis	LOC103951321	hydroxyproline O-galactosyltransferase GALT2-like	1.0654	1.4784	1.1126
cell wall.hemicellulose synthesis	LOC103952410	hydroxyproline O-galactosyltransferase GALT2-like	0.83552	1.0856	0.71751
cell wall.hemicellulose synthesis	LOC103952455	hydroxyproline O-galactosyltransferase HPGT3-like	-0.45017	-0.37198	-0.31114
cell wall.hemicellulose synthesis	LOC103958178	hydroxyproline O-galactosyltransferase HPGT1-like	-	1.2643	0.53691
cell wall.hemicellulose synthesis	LOC103958784	hydroxyproline O-galactosyltransferase GALT6-like	-0.52784	-0.53046	-0.1168
cell wall.hemicellulose synthesis	LOC103966080	hydroxyproline O-galactosyltransferase GALT2-like	1.0908	1.6984	1.2722
cell wall.hemicellulose synthesis.xyloglucan.XXXG galactose Tra-ferase	LOC103927970	xyloglucan galactosyltransferase MUR3-like	0.75291	0.53907	0.66253
cell wall.hemicellulose synthesis.glucuronoxylan	LOC103928624	probable glucuronoxylan glucuronosyltransferase IRX7	3.8678	1.5321	1.9863
cell wall.hemicellulose synthesis.glucuronoxylan	LOC103937525	probable glucuronoxylan glucuronosyltransferase IRX7	3.8909	1.4259	1.8425
cell wall.hemicellulose synthesis.glucuronoxylan	LOC103947711	probable glucuronoxylan glucuronosyltransferase IRX7	1.5715	-	0.1786
cell wall.hemicellulose synthesis.glucuronoxylan	LOC103954235	probable galacturonosyltransferase-like 1	2.3324	2.6851	3.31
cell wall.hemicellulose synthesis.glucuronoxylan	LOC103955444	probable galacturonosyltransferase-like 1	1.3797	-	0.66918
cell wall.hemicellulose synthesis.glucuronoxylan	LOC103963163	probable galacturonosyltransferase-like 1	0.79725	1.9946	2.2639
cell wall.hemicellulose synthesis.glucuronoxylan	LOC103967625	probable galacturonosyltransferase-like 1	2.8838	1.6125	1.9331
cell wall.hemicellulose synthesis.glucuronoxylan	LOC103948754	probable galacturonosyltransferase 12	1.6104	-	1.1233
cell wall.hemicellulose synthesis.glucuronoxylan	LOC103931308	probable beta-1,4-xylosyltransferase IRX10L	-0.44379	-0.69849	-0.42399
cell wall.hemicellulose synthesis.glucuronoxylan	LOC103944760	probable beta-1,4-xylosyltransferase IRX10	1.147	1.7107	1.345
cell wall.hemicellulose synthesis.glucuronoxylan	LOC103950395	probable beta-1,4-xylosyltransferase IRX10	1.1685	1.3425	1.0162
cell wall.hemicellulose synthesis.glucuronoxylan	LOC103957108	probable beta-1,4-xylosyltransferase IRX14	-0.32653	-0.28845	0.036572
cell wall.hemicellulose synthesis.glucuronoxylan	LOC103961589	probable beta-1,4-xylosyltransferase IRX14	-0.86179	-0.55921	-0.56363
cell wall.hemicellulose synthesis.glucuronoxylan	LOC103962640	probable beta-1,4-xylosyltransferase IRX10L	-0.41816	-	-0.25179
cell wall.hemicellulose synthesis.glucuronoxylan	LOC103951152	putative UDP-glucuronate:xylan alpha-glucuronosyltransferase 3	-1.8375	-	-0.70192
cell wall.hemicellulose synthesis.glucuronoxylan	LOC103951153	putative UDP-glucuronate:xylan alpha-glucuronosyltransferase 3	-	0.38041	0.25822
cell wall.pectin synthesis	LOC103961216	galacturonosyltransferase 8-like	0.35582	1.2863	0.71176
cell wall.pectin synthesis	LOC103961410	galacturonosyltransferase 8-like	0.79905	1.6094	0.92684
cell wall.cell wall protei-.AGPs.AGP	LOC103931429	arabinogalactan peptide 13-like	2.1901	1.6802	1.2502
cell wall.cell wall protei-.AGPs.AGP	LOC103948062	arabinogalactan peptide 20-like	-	-4.5087	-3.9641
cell wall.cell wall protei-.AGPs.AGP	LOC103958168	arabinogalactan peptide 20-like	-	-4.8723	-4.4536
cell wall.cell wall protei-.AGPs.AGP	LOC103964675	arabinogalactan peptide 13-like	1.9365	1.7458	0.60756
cell wall.cell wall protei-.AGPs.AGP	LOC103966436	arabinogalactan peptide 16-like	1.6163	2.6105	1.3931
cell wall.cell wall protei-.proline rich protei-	LOC103929018	proline-rich protein 4-like	0.92937	1.574	1.1839
cell wall.cell wall protei-.proline rich protei-	LOC103938352	proline-rich protein 4	0.30176	0.57235	0.64939
cell wall.cell wall protei-.LRR	LOC103926765	leucine-rich repeat receptor-like serine/threonine/tyrosine-protein kinase SOBIR1	1.6763	-0.64128	1.1943
cell wall.cell wall protei-.LRR	LOC103926858	probable leucine-rich repeat receptor-like serine/threonine-protein kinase At3g14840	1.8396	-	0.79559
cell wall.cell wall protei-.LRR	LOC103927207	pollen-specific leucine-rich repeat extensin-like protein 1	1.9885	1.3399	1.6362
cell wall.cell wall protei-.LRR	LOC103927536	leucine-rich repeat extensin-like protein 1	1.5966	-	1.2786
cell wall.cell wall protei-.LRR	LOC103927661	leucine-rich repeat receptor-like protein kinase PXC1	1.1715	2.2647	1.2841
cell wall.cell wall protei-.LRR	LOC103927782	probably inactive leucine-rich repeat receptor-like protein kinase At3g28040	-0.78134	-0.55522	-1.0972
cell wall.cell wall protei-.LRR	LOC103928745	probable leucine-rich repeat receptor-like protein kinase At1g35710	-6.5821	-7.9298	-2.7711
cell wall.cell wall protei-.LRR	LOC103928786	probable leucine-rich repeat receptor-like protein kinase At1g35710	-	-1.0367	-0.74373
cell wall.cell wall protei-.LRR	LOC103929065	leucine-rich repeat receptor protein kinase EMS1-like	-	-	1.2865
cell wall.cell wall protei-.LRR	LOC103929189	putative leucine-rich repeat receptor-like serine/threonine-protein kinase At2g14440	0.83661	1.6219	1.0959
cell wall.cell wall protei-.LRR	LOC103929433	leucine-rich repeat extensin-like protein 3	1.1836	0.62374	0.55517
cell wall.cell wall protei-.LRR	LOC103930268	probable leucine-rich repeat receptor-like protein kinase At5g49770	-0.29266	-0.33992	-0.19712
cell wall.cell wall protei-.LRR	LOC103932690	leucine-rich repeat receptor-like protein kinase TDR	0.95978	1.4146	1.2183
cell wall.cell wall protei-.LRR	LOC103933126	inactive leucine-rich repeat receptor-like serine/threonine-protein kinase At1g60630	1.089	2.1838	1.6886
cell wall.cell wall protei-.LRR	LOC103933873	leucine-rich repeat receptor-like protein kinase TDR	-	1.1574	0.4804
cell wall.cell wall protei-.LRR	LOC103934364	probably inactive leucine-rich repeat receptor-like protein kinase At5g48380	-	-1.1153	0.46728
cell wall.cell wall protei-.LRR	LOC103935703	leucine-rich repeat receptor-like protein kinase PXL1	-	1.258	0.43317
cell wall.cell wall protei-.LRR	LOC103936400	leucine-rich repeat extensin-like protein 1	-1.2311	-1.1713	-1.0215
cell wall.cell wall protei-.LRR	LOC103938234	probable inactive leucine-rich repeat receptor-like protein kinase At3g03770	-	0.79087	0.20702
cell wall.cell wall protei-.LRR	LOC103939409	leucine-rich repeat extensin-like protein 3	0.97658	1.6039	0.97058
cell wall.cell wall protei-.LRR	LOC103940091	leucine-rich repeat extensin-like protein 4	0.8926	0.82647	0.87402
cell wall.cell wall protei-.LRR	LOC103940598	leucine-rich repeat extensin-like protein 3	-0.55006	0.49245	0.084401
cell wall.cell wall protei-.LRR	LOC103941287	probably inactive leucine-rich repeat receptor-like protein kinase At5g06940	1.3486	1.0805	1.2532
cell wall.cell wall protei-.LRR	LOC103941467	leucine-rich repeat receptor protein kinase EMS1-like	0.66588	-	1.3982
cell wall.cell wall protei-.LRR	LOC103942220	probable leucine-rich repeat receptor-like protein kinase IMK3	2.6934	2.3153	2.1248
cell wall.cell wall protei-.LRR	LOC103942234	leucine-rich repeat receptor-like serine/threonine/tyrosine-protein kinase SOBIR1	-	-0.83329	1.368
cell wall.cell wall protei-.LRR	LOC103942369	leucine-rich repeat receptor-like serine/threonine-protein kinase At1g17230	-1.1587	-	0.085147
cell wall.cell wall protei-.LRR	LOC103942590	probably inactive leucine-rich repeat receptor-like protein kinase At5g06940	0.8806	2.0089	0.94496
cell wall.cell wall protei-.LRR	LOC103942771	pollen-specific leucine-rich repeat extensin-like protein 4	-1.5471	-6.1118	-1.9421
cell wall.cell wall protei-.LRR	LOC103943315	pollen-specific leucine-rich repeat extensin-like protein 3	-1.5237	-4.9971	-1.9554
cell wall.cell wall protei-.LRR	LOC103943756	putative leucine-rich repeat-containing protein DDB_G0290503	-1.7431	-1.6388	-1.3559
cell wall.cell wall protei-.LRR	LOC103943845	leucine-rich repeat extensin-like protein 4	1.7809	1.7597	1.2939
cell wall.cell wall protei-.LRR	LOC103943927	leucine-rich repeat extensin-like protein 6	-0.62886	0.45567	-0.462
cell wall.cell wall protei-.LRR	LOC103944180	putative leucine-rich repeat receptor-like serine/threonine-protein kinase At2g14440	0.48132	0.67579	0.50966
cell wall.cell wall protei-.LRR	LOC103944373	probable inactive leucine-rich repeat receptor-like protein kinase At3g03770	1.3247	1.6197	0.94048
cell wall.cell wall protei-.LRR	LOC103944985	leucine-rich repeat receptor-like serine/threonine-protein kinase BAM3	0.75213	0.79607	0.20689
cell wall.cell wall protei-.LRR	LOC103945042	probable leucine-rich repeat receptor-like protein kinase At1g35710	-	1.5989	0.80784
cell wall.cell wall protei-.LRR	LOC103945385	putative leucine-rich repeat receptor-like serine/threonine-protein kinase At2g24130	2.3199	-	1.1041
cell wall.cell wall protei-.LRR	LOC103945716	leucine-rich repeat receptor-like serine/threonine-protein kinase BAM1	1.0792	1.6775	1.2036
cell wall.cell wall protei-.LRR	LOC103945946	leucine-rich repeat receptor-like serine/threonine-protein kinase At1g17230	-0.61522	-1.1924	-0.95314
cell wall.cell wall protei-.LRR	LOC103946122	probable inactive leucine-rich repeat receptor-like protein kinase At3g03770	-	-0.2918	-0.35862
cell wall.cell wall protei-.LRR	LOC103946335	probable leucine-rich repeat receptor-like protein kinase At5g63930	-	1.3916	0.66604
cell wall.cell wall protei-.LRR	LOC103946355	leucine-rich repeat receptor-like serine/threonine-protein kinase BAM3	0.47265	0.91041	0.58404
cell wall.cell wall protei-.LRR	LOC103946509	leucine-rich repeat receptor-like tyrosine-protein kinase PXC3	1.1559	2.2025	0.83555
cell wall.cell wall protei-.LRR	LOC103947116	putative leucine-rich repeat receptor-like serine/threonine-protein kinase At2g14440	1.2911	1.5343	1.2616
cell wall.cell wall protei-.LRR	LOC103947177	probable leucine-rich repeat receptor-like protein kinase At1g68400	1.8404	2.1281	1.6452
cell wall.cell wall protei-.LRR	LOC103947226	probable leucine-rich repeat receptor-like protein kinase At1g35710	0.30107	0.70296	0.56145
cell wall.cell wall protei-.LRR	LOC103947463	probable leucine-rich repeat receptor-like protein kinase At1g35710	-0.59648	-	0.58653
cell wall.cell wall protei-.LRR	LOC103949198	leucine-rich repeat receptor-like protein kinase TDR	0.75429	0.37852	0.35278
cell wall.cell wall protei-.LRR	LOC103949418	probable leucine-rich repeat receptor-like protein kinase At1g68400	1.8525	1.742	1.4753
cell wall.cell wall protei-.LRR	LOC103949546	probably inactive leucine-rich repeat receptor-like protein kinase At5g48380	-0.26711	-0.82793	-0.29755
cell wall.cell wall protei-.LRR	LOC103949622	leucine-rich repeat extensin-like protein 3	-2.5268	-4.1078	-1.7611
cell wall.cell wall protei-.LRR	LOC103949966	probable leucine-rich repeat receptor-like serine/threonine-protein kinase At3g14840	1.3236	-	0.87019
cell wall.cell wall protei-.LRR	LOC103949971	probable leucine-rich repeat receptor-like serine/threonine-protein kinase At3g14840	0.73012	-1.8234	-0.11935
cell wall.cell wall protei-.LRR	LOC103949972	probable leucine-rich repeat receptor-like serine/threonine-protein kinase At3g14840	2.7266	0.68719	1.9179
cell wall.cell wall protei-.LRR	LOC103949974	probable leucine-rich repeat receptor-like serine/threonine-protein kinase At3g14840	2.4519	-	1.5601
cell wall.cell wall protei-.LRR	LOC103950031	probable inactive leucine-rich repeat receptor-like protein kinase At3g03770	1.0242	1.0265	0.88145
cell wall.cell wall protei-.LRR	LOC103950409	inactive leucine-rich repeat receptor-like protein kinase CORYNE	1.6917	1.821	0.68275
cell wall.cell wall protei-.LRR	LOC103952136	probable leucine-rich repeat receptor-like protein kinase At1g68400	2.4038	1.7281	1.7722
cell wall.cell wall protei-.LRR	LOC103952227	probable leucine-rich repeat receptor-like protein kinase At2g33170	-1.3811	-1.1204	-0.97163
cell wall.cell wall protei-.LRR	LOC103952284	probable leucine-rich repeat receptor-like protein kinase At5g63930	0.64972	-0.29427	-0.032171
cell wall.cell wall protei-.LRR	LOC103952493	pollen-specific leucine-rich repeat extensin-like protein 1	-0.22929	-1.6525	-1.4659
cell wall.cell wall protei-.LRR	LOC103953278	leucine-rich repeat receptor-like serine/threonine-protein kinase BAM3	1.5098	2.238	1.4846
cell wall.cell wall protei-.LRR	LOC103953326	leucine-rich repeat receptor protein kinase EMS1-like	0.70312	1.0034	0.74714
cell wall.cell wall protei-.LRR	LOC103954138	putative leucine-rich repeat receptor-like serine/threonine-protein kinase At2g14440	-	1.9597	0.99425
cell wall.cell wall protei-.LRR	LOC103955333	probable leucine-rich repeat receptor-like protein kinase At5g63930	1.1128	0.55441	0.84402
cell wall.cell wall protei-.LRR	LOC103955512	leucine-rich repeat receptor-like kinase protein FLORAL ORGAN NUMBER1	0.77651	1.6296	1.0404
cell wall.cell wall protei-.LRR	LOC103955816	probable leucine-rich repeat receptor-like protein kinase At5g49770	-	-0.66867	0.29846
cell wall.cell wall protei-.LRR	LOC103956065	leucine-rich repeat receptor-like protein kinase TDR	1.6434	2.1443	1.518
cell wall.cell wall protei-.LRR	LOC103956252	probable inactive leucine-rich repeat receptor-like protein kinase At3g03770	-1.7762	-1.3523	-1.5031
cell wall.cell wall protei-.LRR	LOC103957129	probably inactive leucine-rich repeat receptor-like protein kinase At2g25790	-	-1.5532	-0.23078
cell wall.cell wall protei-.LRR	LOC103958078	leucine-rich repeat receptor-like serine/threonine-protein kinase BAM3	1.691	1.8675	1.2854
cell wall.cell wall protei-.LRR	LOC103958660	probable leucine-rich repeat receptor-like protein kinase IMK3	2.1611	1.7931	1.4262
cell wall.cell wall protei-.LRR	LOC103959341	leucine-rich repeat extensin-like protein 3	0.94796	2.1691	1.386
cell wall.cell wall protei-.LRR	LOC103959862	leucine-rich repeat receptor-like protein kinase TDR	1.5539	2.0716	1.1781
cell wall.cell wall protei-.LRR	LOC103960154	probable leucine-rich repeat receptor-like protein kinase At5g49770	-0.69762	-0.88488	-0.44542
cell wall.cell wall protei-.LRR	LOC103960400	probably inactive leucine-rich repeat receptor-like protein kinase At3g28040	-0.27053	-	-0.23852
cell wall.cell wall protei-.LRR	LOC103960907	probable inactive leucine-rich repeat receptor-like protein kinase At3g03770	1.7859	1.2787	1.2542
cell wall.cell wall protei-.LRR	LOC103961062	putative leucine-rich repeat-containing protein DDB_G0290503	0.91904	0.58084	0.41323
cell wall.cell wall protei-.LRR	LOC103961214	leucine-rich repeat receptor-like protein kinase PXC2	1.6882	1.7004	1.3926
cell wall.cell wall protei-.LRR	LOC103961271	probable leucine-rich repeat receptor-like protein kinase At1g35710	-	-1.553	-0.60624
cell wall.cell wall protei-.LRR	LOC103961281	probable leucine-rich repeat receptor-like protein kinase At1g35710	-2.6393	-4.3639	-2.3906
cell wall.cell wall protei-.LRR	LOC103961938	leucine-rich repeat receptor-like protein kinase TDR	1.9646	2.1939	1.4635
cell wall.cell wall protei-.LRR	LOC103962135	probably inactive leucine-rich repeat receptor-like protein kinase IMK2	1.9014	2.1526	1.9527
cell wall.cell wall protei-.LRR	LOC103962730	leucine-rich repeat extensin-like protein 3	-0.6318	1.4422	0.36064
cell wall.cell wall protei-.LRR	LOC103963383	leucine-rich repeat receptor-like protein kinase TDR	1.306	1.8305	1.5345
cell wall.cell wall protei-.LRR	LOC103964653	leucine-rich repeat receptor-like serine/threonine-protein kinase BAM1	1.6263	1.8882	1.1588
cell wall.cell wall protei-.LRR	LOC103965036	leucine-rich repeat extensin-like protein 4	-0.86162	-1.0727	-0.3142
cell wall.cell wall protei-.LRR	LOC103965407	probable leucine-rich repeat receptor-like serine/threonine-protein kinase At3g14840	-	-2.9847	-1.1605
cell wall.cell wall protei-.LRR	LOC103965989	leucine-rich repeat extensin-like protein 4	-0.56008	-0.35975	-0.38718
cell wall.cell wall protei-.LRR	LOC103966271	probable leucine-rich repeat receptor-like protein kinase At5g49770	-0.66262	-0.85067	-0.11931
cell wall.cell wall protei-.LRR	LOC103967260	inactive leucine-rich repeat receptor-like protein kinase CORYNE	1.0849	2.4567	1.251
cell wall.cell wall protei-.LRR	LOC103968022	leucine-rich repeat receptor-like tyrosine-protein kinase PXC3	1.2254	2.1794	0.87609
cell wall.cell wall protei-.LRR	LOC103968110	probable leucine-rich repeat receptor-like protein kinase At5g63930	-1.8472	-2.7348	-1.6161
cell wall.cell wall protei-.LRR	LOC108865670	probably inactive leucine-rich repeat receptor-like protein kinase At2g25790	4.354	-	1.9098
cell wall.cell wall protei-.HRGP	LOC103928354	FRIGIDA-like protein 5	-	3.4332	2.6109
cell wall.cell wall protei-.HRGP	LOC103928355	FRIGIDA-like protein 5	1.5864	1.0742	1.0185
cell wall.cell wall protei-.HRGP	LOC103934022	FRIGIDA-like protein 5	1.4107	0.82633	1.136
cell wall.cell wall protei-.HRGP	LOC103934032	FRIGIDA-like protein 1	-	-0.69832	-0.28885
cell wall.cell wall protei-.HRGP	LOC103934371	FRIGIDA-like protein 3	-0.32531	-0.38136	0.077786
cell wall.cell wall protei-.HRGP	LOC103938844	FRIGIDA-like protein 4a	-	-0.39549	-0.23718
cell wall.cell wall protei-.HRGP	LOC103943798	FRIGIDA-like protein 1	-	-0.59023	-0.50009
cell wall.cell wall protei-.HRGP	LOC103944187	protein FRIGIDA-ESSENTIAL 1	-	-0.48379	-0.19146
cell wall.cell wall protei-.HRGP	LOC103949547	FRIGIDA-like protein 3	-0.2207	-0.49293	-0.20269
cell wall.cell wall protei-.HRGP	LOC103959223	FRIGIDA-like protein 4a	-	-0.32137	0.023087
cell wall.cell wall protei-.HRGP	LOC103962875	FRIGIDA-like protein 5	-	-0.96997	-0.61621
cell wall.cell wall protei-.RGP	LOC103926584	alpha-1,4-glucan-protein synthase [UDP-forming] 1-like	-	1.2229	-0.58671
cell wall.cell wall protei-.RGP	LOC103930395	alpha-1,4-glucan-protein synthase [UDP-forming] 2	1.2527	2.0963	1.416
cell wall.cell wall protei-.RGP	LOC103937933	alpha-1,4-glucan-protein synthase [UDP-forming]	0.93337	1.5438	0.97761
cell wall.cell wall protei-.RGP	LOC103962742	alpha-1,4-glucan-protein synthase [UDP-forming] 1	-	1.8048	0.15318
cell wall.degradation	LOC103930738	heparanase-like protein 3	-1.3343	-0.88031	-0.8738
cell wall.degradation	LOC103930972	heparanase-like protein 1	-	0.30079	0.36719
cell wall.degradation	LOC103931364	heparanase-like protein 1	-0.89195	-1.1388	-0.81877
cell wall.degradation	LOC103949167	heparanase-like protein 3	-1.4533	-1.0751	-0.84446
cell wall.degradation	LOC103953861	heparanase-like protein 3	-	0.63193	-0.15636
cell wall.degradation.cellulases and beta -1,4-glucanases	LOC103927919	endoglucanase 2	-	1.6877	0.65119
cell wall.degradation.cellulases and beta -1,4-glucanases	LOC103928398	endoglucanase 17-like	-	2.1688	0.57181
cell wall.degradation.cellulases and beta -1,4-glucanases	LOC103929653	endoglucanase 16-like	-	-4.4098	-1.8593
cell wall.degradation.cellulases and beta -1,4-glucanases	LOC103931993	endoglucanase 9-like	-1.2839	-3.5389	-1.3861
cell wall.degradation.cellulases and beta -1,4-glucanases	LOC103935785	endoglucanase 20-like	-5.2893	-7.4935	-3.8955
cell wall.degradation.cellulases and beta -1,4-glucanases	LOC103938177	endoglucanase 6-like	1.3236	2.2267	0.86593
cell wall.degradation.cellulases and beta -1,4-glucanases	LOC103943206	endoglucanase 5	1.8105	-	0.5572
cell wall.degradation.cellulases and beta -1,4-glucanases	LOC103949220	endoglucanase 6-like	0.86228	2.1006	1.1584
cell wall.degradation.cellulases and beta -1,4-glucanases	LOC103950695	endoglucanase CX-like	-	4.4945	1.088
cell wall.degradation.cellulases and beta -1,4-glucanases	LOC103952871	endoglucanase 16-like	-	-3.0868	-2.6707
cell wall.degradation.cellulases and beta -1,4-glucanases	LOC103953375	endoglucanase 20-like	-4.6993	-6.8843	-2.8527
cell wall.degradation.cellulases and beta -1,4-glucanases	LOC103954973	endoglucanase 11	-	1.9053	0.77561
cell wall.degradation.cellulases and beta -1,4-glucanases	LOC103956569	endoglucanase 9	-	2.7914	2.0005
cell wall.degradation.cellulases and beta -1,4-glucanases	LOC103966933	endoglucanase 24-like	-	2.1606	0.31604
cell wall.degradation.cellulases and beta -1,4-glucanases	LOC103967200	endoglucanase 17	-	2.3324	1.7795
cell wall.degradation.mannan-xylose-arabinose-fucose	LOC103928701	mannan endo-1,4-beta-mannosidase 7-like	0.42507	2.0698	0.90084
cell wall.degradation.mannan-xylose-arabinose-fucose	LOC103928833	mannan endo-1,4-beta-mannosidase 2-like	0.76929	0.68801	0.67638
cell wall.degradation.mannan-xylose-arabinose-fucose	LOC103930224	mannan endo-1,4-beta-mannosidase 6	-	2.1886	0.514
cell wall.degradation.mannan-xylose-arabinose-fucose	LOC103932796	mannan endo-1,4-beta-mannosidase 7	-	2.9243	1.0831
cell wall.degradation.mannan-xylose-arabinose-fucose	LOC103954979	mannan endo-1,4-beta-mannosidase 7-like	-	2.1344	1.0462
cell wall.degradation.mannan-xylose-arabinose-fucose	LOC103955377	mannan endo-1,4-beta-mannosidase 7-like	0.96252	1.8686	1.0052
cell wall.degradation.mannan-xylose-arabinose-fucose	LOC103939457	beta-xylosidase/alpha-L-arabinofuranosidase 2-like	1.6243	1.9748	1.3409
cell wall.degradation.mannan-xylose-arabinose-fucose	LOC103945258	beta-xylosidase/alpha-L-arabinofuranosidase 2-like	1.7691	1.9345	1.4566
cell wall.degradation.mannan-xylose-arabinose-fucose	LOC103966209	alpha-L-arabinofuranosidase 1	-4.6915	-4.0704	-2.9471
cell wall.degradation.mannan-xylose-arabinose-fucose	LOC103968089	beta-xylosidase/alpha-L-arabinofuranosidase 1-like	-0.231	-	-0.91271
cell wall.degradation.mannan-xylose-arabinose-fucose	LOC103931980	probable beta-D-xylosidase 2	2.9586	0.77834	2.0578
cell wall.degradation.mannan-xylose-arabinose-fucose	LOC103940503	putative beta-D-xylosidase	-5.4346	-3.1959	-3.0465
cell wall.degradation.mannan-xylose-arabinose-fucose	LOC103959046	probable beta-D-xylosidase 7	1.5307	1.1366	1.4036
cell wall.degradation.mannan-xylose-arabinose-fucose	LOC103959328	putative beta-D-xylosidase	-7.3885	-5.8966	-3.1845
cell wall.degradation.mannan-xylose-arabinose-fucose	LOC103967163	probable beta-D-xylosidase 2	-	2.2437	1.4088
cell wall.degradation.mannan-xylose-arabinose-fucose	LOC103931262	probable xyloglucan endotransglucosylase/hydrolase protein 6	-1.4909	-4.8504	-1.764
cell wall.degradation.mannan-xylose-arabinose-fucose	LOC103933015	probable xyloglucan endotransglucosylase/hydrolase protein 8	1.356	1.7541	1.0835
cell wall.degradation.mannan-xylose-arabinose-fucose	LOC103933098	xyloglucan endotransglucosylase/hydrolase protein 24-like	-	-4.689	-2.3289
cell wall.degradation.mannan-xylose-arabinose-fucose	LOC103935747	xyloglucan endotransglucosylase/hydrolase 2-like	1.6943	0.8837	1.5615
cell wall.degradation.mannan-xylose-arabinose-fucose	LOC103936029	probable xyloglucan endotransglucosylase/hydrolase protein 30	-5.4969	-4.0522	-2.6243
cell wall.degradation.mannan-xylose-arabinose-fucose	LOC103936392	xyloglucan endotransglucosylase/hydrolase protein 24-like	-	-3.8516	-1.4158
cell wall.degradation.mannan-xylose-arabinose-fucose	LOC103940134	probable xyloglucan endotransglucosylase/hydrolase protein 30	-4.556	-3.8834	-3.1056
cell wall.degradation.mannan-xylose-arabinose-fucose	LOC103943109	probable xyloglucan endotransglucosylase/hydrolase protein 28	-0.85156	-1.2332	-1.1172
cell wall.degradation.mannan-xylose-arabinose-fucose	LOC103944494	xyloglucan endotransglucosylase/hydrolase protein 9-like	-1.1849	-1.4658	-0.7797
cell wall.degradation.mannan-xylose-arabinose-fucose	LOC103944733	probable xyloglucan endotransglucosylase/hydrolase protein B	0.75935	2.5802	1.3321
cell wall.degradation.mannan-xylose-arabinose-fucose	LOC103945725	probable xyloglucan endotransglucosylase/hydrolase protein 6	-4.4332	-7.4637	-3.1357
cell wall.degradation.mannan-xylose-arabinose-fucose	LOC103945729	probable xyloglucan endotransglucosylase/hydrolase protein 6	-4.4811	-6.8034	-2.4308
cell wall.degradation.mannan-xylose-arabinose-fucose	LOC103945749	probable xyloglucan endotransglucosylase/hydrolase protein 6	-4.2522	-7.0384	-2.9872
cell wall.degradation.mannan-xylose-arabinose-fucose	LOC103946960	xyloglucan endotransglucosylase/hydrolase protein 9-like	0.65232	1.2922	0.13561
cell wall.degradation.mannan-xylose-arabinose-fucose	LOC103947454	xyloglucan endotransglucosylase/hydrolase 2-like	3.8878	-	-0.27062
cell wall.degradation.mannan-xylose-arabinose-fucose	LOC103947455	probable xyloglucan endotransglucosylase/hydrolase protein 16	3.7038	-4.5641	0.042762
cell wall.degradation.mannan-xylose-arabinose-fucose	LOC103947456	xyloglucan endotransglucosylase/hydrolase 2-like	2.056	-4.4251	-1.0009
cell wall.degradation.mannan-xylose-arabinose-fucose	LOC103947458	xyloglucan endotransglucosylase/hydrolase 2-like	1.1779	-1.7978	0.15957
cell wall.degradation.mannan-xylose-arabinose-fucose	LOC103947710	xyloglucan endotransglucosylase/hydrolase protein 31-like	-	5.2256	3.3877
cell wall.degradation.mannan-xylose-arabinose-fucose	LOC103948136	probable xyloglucan endotransglucosylase/hydrolase protein 8	1.6456	1.8644	1.4212
cell wall.degradation.mannan-xylose-arabinose-fucose	LOC103962487	probable xyloglucan endotransglucosylase/hydrolase protein 30	-3.8347	-6.4752	-3.08
cell wall.degradation.mannan-xylose-arabinose-fucose	LOC103962581	xyloglucan endotransglucosylase/hydrolase 2-like	-3.0875	-1.0441	-1.0225
cell wall.degradation.mannan-xylose-arabinose-fucose	LOC103965682	probable xyloglucan endotransglucosylase/hydrolase protein 32	-1.0333	2.1533	1.0396
cell wall.degradation.mannan-xylose-arabinose-fucose	LOC108865294	xyloglucan endotransglucosylase/hydrolase protein 9-like	-1.1267	-1.6001	-0.91605
cell wall.degradation.pectate lyases and polygalacturonases	LOC103928577	probable pectate lyase 4	-	-0.49236	-0.38558
cell wall.degradation.pectate lyases and polygalacturonases	LOC103932918	pectate lyase-like	1.29	2.3434	1.7078
cell wall.degradation.pectate lyases and polygalacturonases	LOC103933703	probable pectate lyase 4	-	1.003	0.87051
cell wall.degradation.pectate lyases and polygalacturonases	LOC103934836	pectate lyase-like	-1.2125	-5.6102	-2.2226
cell wall.degradation.pectate lyases and polygalacturonases	LOC103941377	probable pectate lyase 8	-	1.5795	0.64061
cell wall.degradation.pectate lyases and polygalacturonases	LOC103949353	probable pectate lyase 12	0.80896	2.4176	1.3031
cell wall.degradation.pectate lyases and polygalacturonases	LOC103949854	probable pectate lyase 5	0.55236	1.7771	-0.1886
cell wall.degradation.pectate lyases and polygalacturonases	LOC103950090	probable pectate lyase 18	1.7394	2.6275	1.4393
cell wall.degradation.pectate lyases and polygalacturonases	LOC103950867	probable pectate lyase 3	-1.1598	-5.1736	-1.9629
cell wall.degradation.pectate lyases and polygalacturonases	LOC103952213	probable pectate lyase 8	1.4524	2.3449	1.4955
cell wall.degradation.pectate lyases and polygalacturonases	LOC103958056	probable pectate lyase 4	-	0.82762	0.54499
cell wall.degradation.pectate lyases and polygalacturonases	LOC103958414	probable pectate lyase 13	1.4598	1.8901	1.2288
cell wall.degradation.pectate lyases and polygalacturonases	LOC103958471	probable pectate lyase 13	1.4326	1.451	0.89999
cell wall.degradation.pectate lyases and polygalacturonases	LOC103959417	probable pectate lyase 8	0.65499	1.9818	0.59736
cell wall.degradation.pectate lyases and polygalacturonases	LOC103960439	probable pectate lyase 8	0.39325	2.0537	1.052
cell wall.degradation.pectate lyases and polygalacturonases	LOC103961790	pectate lyase 1-like	-1.623	-	-1.2056
cell wall.degradation.pectate lyases and polygalacturonases	LOC103965700	probable pectate lyase 12	1.2724	2.2681	1.1217
cell wall.degradation.pectate lyases and polygalacturonases	LOC103965771	probable pectate lyase 4	0.41072	0.99072	0.58048
cell wall.degradation.pectate lyases and polygalacturonases	LOC103966059	probable pectate lyase 1	1.8728	2.3293	1.5528
cell wall.degradation.pectate lyases and polygalacturonases	LOC103926982	polygalacturonase At1g48100-like	-	2.3725	-0.35336
cell wall.degradation.pectate lyases and polygalacturonases	LOC103928758	polygalacturonase-like	-2.0896	-2.7594	-2.2939
cell wall.degradation.pectate lyases and polygalacturonases	LOC103929686	probable polygalacturonase	-0.31827	-	-0.058192
cell wall.degradation.pectate lyases and polygalacturonases	LOC103930699	probable polygalacturonase At1g80170	-	0.55228	0.26966
cell wall.degradation.pectate lyases and polygalacturonases	LOC103932418	polygalacturonase QRT3-like	-	2.9514	0.71132
cell wall.degradation.pectate lyases and polygalacturonases	LOC103933401	probable polygalacturonase	-0.90847	-1.4137	-0.74272
cell wall.degradation.pectate lyases and polygalacturonases	LOC103936958	probable polygalacturonase	1.7428	1.3824	0.98447
cell wall.degradation.pectate lyases and polygalacturonases	LOC103937941	probable polygalacturonase	1.6244	1.2019	0.38264
cell wall.degradation.pectate lyases and polygalacturonases	LOC103938334	probable polygalacturonase	-1.2724	-0.26612	0.093821
cell wall.degradation.pectate lyases and polygalacturonases	LOC103941345	probable polygalacturonase	0.44947	1.8223	0.43133
cell wall.degradation.pectate lyases and polygalacturonases	LOC103945184	polygalacturonase QRT3-like	-	3.2243	-0.52253
cell wall.degradation.pectate lyases and polygalacturonases	LOC103947767	polygalacturonase inhibitor	-4.7371	-8.909	-2.4206
cell wall.degradation.pectate lyases and polygalacturonases	LOC103947768	polygalacturonase inhibitor-like	-3.1299	-5.4609	-2.0597
cell wall.degradation.pectate lyases and polygalacturonases	LOC103950253	probable polygalacturonase	0.74995	0.49517	0.70976
cell wall.degradation.pectate lyases and polygalacturonases	LOC103953071	probable polygalacturonase	-1.4593	-1.7678	-1.3475
cell wall.degradation.pectate lyases and polygalacturonases	LOC103953242	polygalacturonase QRT3	-	1.5261	0.02065
cell wall.degradation.pectate lyases and polygalacturonases	LOC103953243	polygalacturonase QRT3	-2.144	-	-1.121
cell wall.degradation.pectate lyases and polygalacturonases	LOC103953527	polygalacturonase 1 beta-like protein 3	1.0773	1.1227	0.56739
cell wall.degradation.pectate lyases and polygalacturonases	LOC103956861	polygalacturonase At1g48100	-	-1.7563	-0.27299
cell wall.degradation.pectate lyases and polygalacturonases	LOC103958214	probable polygalacturonase	-6.99	-6.5347	-3.5648
cell wall.degradation.pectate lyases and polygalacturonases	LOC103959368	probable polygalacturonase	2.4725	1.5022	1.3497
cell wall.degradation.pectate lyases and polygalacturonases	LOC103961249	polygalacturonase At1g48100	-1.2424	2.5294	0.71283
cell wall.degradation.pectate lyases and polygalacturonases	LOC103964325	probable polygalacturonase	-	-1.8923	-0.93505
cell wall.degradation.pectate lyases and polygalacturonases	LOC103967190	probable polygalacturonase	-	-1.3039	-0.21705
cell wall.modification	LOC103931262	probable xyloglucan endotransglucosylase/hydrolase protein 6	-1.4909	-4.8504	-1.764
cell wall.modification	LOC103933015	probable xyloglucan endotransglucosylase/hydrolase protein 8	1.356	1.7541	1.0835
cell wall.modification	LOC103933098	xyloglucan endotransglucosylase/hydrolase protein 24-like	-	-4.689	-2.3289
cell wall.modification	LOC103935747	xyloglucan endotransglucosylase/hydrolase 2-like	1.6943	0.8837	1.5615
cell wall.modification	LOC103936029	probable xyloglucan endotransglucosylase/hydrolase protein 30	-5.4969	-4.0522	-2.6243
cell wall.modification	LOC103936392	xyloglucan endotransglucosylase/hydrolase protein 24-like	-	-3.8516	-1.4158
cell wall.modification	LOC103940134	probable xyloglucan endotransglucosylase/hydrolase protein 30	-4.556	-3.8834	-3.1056
cell wall.modification	LOC103943109	probable xyloglucan endotransglucosylase/hydrolase protein 28	-0.85156	-1.2332	-1.1172
cell wall.modification	LOC103944494	xyloglucan endotransglucosylase/hydrolase protein 9-like	-1.1849	-1.4658	-0.7797
cell wall.modification	LOC103944733	probable xyloglucan endotransglucosylase/hydrolase protein B	0.75935	2.5802	1.3321
cell wall.modification	LOC103945725	probable xyloglucan endotransglucosylase/hydrolase protein 6	-4.4332	-7.4637	-3.1357
cell wall.modification	LOC103945729	probable xyloglucan endotransglucosylase/hydrolase protein 6	-4.4811	-6.8034	-2.4308
cell wall.modification	LOC103945749	probable xyloglucan endotransglucosylase/hydrolase protein 6	-4.2522	-7.0384	-2.9872
cell wall.modification	LOC103946960	xyloglucan endotransglucosylase/hydrolase protein 9-like	0.65232	1.2922	0.13561
cell wall.modification	LOC103947454	xyloglucan endotransglucosylase/hydrolase 2-like	3.8878	-	-0.27062
cell wall.modification	LOC103947455	probable xyloglucan endotransglucosylase/hydrolase protein 16	3.7038	-4.5641	0.042762
cell wall.modification	LOC103947456	xyloglucan endotransglucosylase/hydrolase 2-like	2.056	-4.4251	-1.0009
cell wall.modification	LOC103947458	xyloglucan endotransglucosylase/hydrolase 2-like	1.1779	-1.7978	0.15957
cell wall.modification	LOC103947710	xyloglucan endotransglucosylase/hydrolase protein 31-like	-	5.2256	3.3877
cell wall.modification	LOC103948136	probable xyloglucan endotransglucosylase/hydrolase protein 8	1.6456	1.8644	1.4212
cell wall.modification	LOC103962487	probable xyloglucan endotransglucosylase/hydrolase protein 30	-3.8347	-6.4752	-3.08
cell wall.modification	LOC103962581	xyloglucan endotransglucosylase/hydrolase 2-like	-3.0875	-1.0441	-1.0225
cell wall.modification	LOC103965682	probable xyloglucan endotransglucosylase/hydrolase protein 32	-1.0333	2.1533	1.0396
cell wall.modification	LOC108865294	xyloglucan endotransglucosylase/hydrolase protein 9-like	-1.1267	-1.6001	-0.91605
cell wall.modification	LOC103931331	expansin-A1-like	-2.5264	0.58515	1.0742
cell wall.modification	LOC103933582	expansin-like A2	0.52237	-	1.001
cell wall.modification	LOC103934614	expansin-B3-like	0.43825	3.1887	0.97622
cell wall.modification	LOC103935534	expansin-A4-like	-	0.94223	0.56376
cell wall.modification	LOC103940853	expansin-A6-like	1.6382	2.1469	0.5054
cell wall.modification	LOC103941409	expansin-A6-like	1.6695	2.5965	0.60876
cell wall.modification	LOC103948568	expansin-B3-like	-	3.5348	1.5871
cell wall.modification	LOC103949510	expansin-A20-like	0.952	1.4735	1.023
cell wall.modification	LOC103951053	expansin-A10	1.1031	2.1415	1.0119
cell wall.modification	LOC103953745	expansin-A8	-1.7509	2.4313	0.19477
cell wall.modification	LOC103954300	expansin-A4	1.2409	1.9398	0.92397
cell wall.modification	LOC103956790	expansin-A13-like	-	1.1956	1.1844
cell wall.modification	LOC103958701	expansin-A1-like	-	-1.8662	-0.8888
cell wall.modification	LOC103959804	expansin-B15-like	-	2.5015	2.0099
cell wall.modification	LOC103959916	expansin-A13-like	0.7743	1.5628	1.0384
cell wall.modification	LOC103960312	expansin-like B1	-2.632	-5.1555	-3.0573
cell wall.modification	LOC103961929	expansin-B15-like	-	3.7412	3.9971
cell wall.modification	LOC103963298	expansin-A4-like	3.3984	0.57984	2.1707
cell wall.modification	LOC103927571	EG45-like domain containing protein	-7.6113	-4.1353	-4.3899
cell wall.modification	LOC103930170	EG45-like domain containing protein	-4.4289	-6.4988	-2.9398
cell wall.modification	LOC103939807	EG45-like domain containing protein	0.97547	-	0.70047
cell wall.modification	LOC103940245	EG45-like domain containing protein	-1.106	-	0.75779
cell wall.pectin*esterases.PME	LOC103930599	putative pectinesterase/pectinesterase inhibitor 22	-1.8331	-1.7463	-1.3578
cell wall.pectin*esterases.PME	LOC103932075	probable pectinesterase/pectinesterase inhibitor 35	-1.6732	-2.0444	-1.6173
cell wall.pectin*esterases.PME	LOC103933148	probable pectinesterase 15	-	2.6987	1.2057
cell wall.pectin*esterases.PME	LOC103933572	pectinesterase-like	-0.9492	-5.4487	-2.236
cell wall.pectin*esterases.PME	LOC103935180	probable pectinesterase/pectinesterase inhibitor 51	0.85368	1.519	0.82445
cell wall.pectin*esterases.PME	LOC103940509	putative pectinesterase 63	-	-3.7109	-3.06
cell wall.pectin*esterases.PME	LOC103943418	probable pectinesterase/pectinesterase inhibitor 34	2.156	1.9628	1.7124
cell wall.pectin*esterases.PME	LOC103943728	probable pectinesterase/pectinesterase inhibitor 21	-0.93248	-6.7411	-2.0602
cell wall.pectin*esterases.PME	LOC103943729	putative pectinesterase/pectinesterase inhibitor 28	-1.3235	-6.397	-2.3513
cell wall.pectin*esterases.PME	LOC103943915	probable pectinesterase 53	-2.6882	0.72397	-0.55811
cell wall.pectin*esterases.PME	LOC103948035	probable pectinesterase/pectinesterase inhibitor 34	0.28555	-1.829	-0.80056
cell wall.pectin*esterases.PME	LOC103950218	probable pectinesterase/pectinesterase inhibitor 12	0.93146	2.6739	1.3184
cell wall.pectin*esterases.PME	LOC103950219	putative pectinesterase/pectinesterase inhibitor 45	-	-6.0341	-1.8285
cell wall.pectin*esterases.PME	LOC103951034	pectinesterase 31	-0.3344	-	-0.16307
cell wall.pectin*esterases.PME	LOC103951683	probable pectinesterase/pectinesterase inhibitor 51	0.93852	-	1.0494
cell wall.pectin*esterases.PME	LOC103951684	probable pectinesterase/pectinesterase inhibitor 51	0.41774	-	0.44051
cell wall.pectin*esterases.PME	LOC103952831	putative pectinesterase 63	-	-5.3772	-1.2887
cell wall.pectin*esterases.PME	LOC103959115	probable pectinesterase/pectinesterase inhibitor 12	2.396	4.3131	1.9595
cell wall.pectin*esterases.PME	LOC103959193	pectinesterase/pectinesterase inhibitor PPE8B-like	2.6862	3.2283	1.3182
cell wall.pectin*esterases.PME	LOC103962785	probable pectinesterase/pectinesterase inhibitor 51	-	1.5217	0.92173
cell wall.pectin*esterases.PME	LOC103962801	probable pectinesterase/pectinesterase inhibitor 51	1.1193	1.8279	1.0605
cell wall.pectin*esterases.PME	LOC103927212	L-ascorbate oxidase homolog	1.0501	1.5664	1.0829
cell wall.pectin*esterases.PME	LOC103931457	L-ascorbate oxidase homolog	-0.78595	-5.8883	-2.1574
cell wall.pectin*esterases.PME	LOC103931458	L-ascorbate oxidase homolog	-	-4.5649	-2.6649
cell wall.pectin*esterases.PME	LOC103938913	L-ascorbate oxidase homolog	-	2.824	1.5053
cell wall.pectin*esterases.PME	LOC103939701	L-ascorbate oxidase homolog	-	2.52	1.3628
cell wall.pectin*esterases.PME	LOC103944547	L-ascorbate oxidase homolog	-0.91927	1.9314	0.99036
cell wall.pectin*esterases.PME	LOC103948194	L-ascorbate oxidase homolog	0.43835	2.8873	1.3021
cell wall.pectin*esterases.PME	LOC103949621	L-ascorbate oxidase homolog	0.42616	3.1457	1.4632
cell wall.pectin*esterases.PME	LOC103956190	L-ascorbate oxidase homolog	1.2151	2.4526	1.7308
cell wall.pectin*esterases.PME	LOC103957558	L-ascorbate oxidase homolog	5.0795	-	2.2626
cell wall.pectin*esterases.PME	LOC103964981	L-ascorbate oxidase homolog	-1.2413	-6.1386	-2.1178
cell wall.pectin*esterases.PME	LOC103965445	L-ascorbate oxidase homolog	-1.3715	-5.1425	-2.5139
cell wall.pectin*esterases.acetyl esterase	LOC103932211	pectin acetylesterase 9-like	-	1.1447	1.044
cell wall.pectin*esterases.acetyl esterase	LOC103934921	pectin acetylesterase 9-like	-0.82528	-1.7721	-1.2777
cell wall.pectin*esterases.acetyl esterase	LOC103936666	pectin acetylesterase 3-like	1.191	0.77111	1.0102
cell wall.pectin*esterases.acetyl esterase	LOC103941924	pectin acetylesterase 8-like	-0.57175	-0.40137	-0.33483
cell wall.pectin*esterases.acetyl esterase	LOC103944714	pectin acetylesterase 10-like	0.48868	-	0.27781
cell wall.pectin*esterases.acetyl esterase	LOC103950351	pectin acetylesterase 10-like	1.3049	1.6163	0.97572
cell wall.pectin*esterases.acetyl esterase	LOC103953063	pectin acetylesterase 3	1.2152	0.66218	0.97707
cell wall.pectin*esterases.acetyl esterase	LOC103955547	pectin acetylesterase 8-like	-2.1923	-2.3973	-1.602
cell wall.pectin*esterases.acetyl esterase	LOC103955835	pectin acetylesterase 12-like	2.7198	-	1.166
cell wall.pectin*esterases.acetyl esterase	LOC103955836	pectin acetylesterase 10-like	0.55547	1.0334	0.3117
cell wall.pectin*esterases.misc	LOC103931900	monocopper oxidase-like protein SKU5	1.0137	1.158	0.59453
cell wall.pectin*esterases.misc	LOC103932675	monocopper oxidase-like protein SKS1	1.554	2.3606	1.6411
cell wall.pectin*esterases.misc	LOC103949577	monocopper oxidase-like protein SKU5	0.61182	1.3877	0.78898
cell wall.pectin*esterases.misc	LOC103959835	monocopper oxidase-like protein SKS1	-	1.5796	0.2998
cell wall.pectin*esterases.misc	LOC103963402	monocopper oxidase-like protein SKS1	1.6513	2.3727	1.6707
major CHO metabolism.synthesis.sucrose.SPS	LOC103932736	probable sucrose-phosphate synthase 1	-1.573	-2.1464	-1.0896
major CHO metabolism.synthesis.sucrose.SPS	LOC103932737	probable sucrose-phosphate synthase 1	-0.76131	-2.9272	-1.5119
major CHO metabolism.synthesis.sucrose.SPS	LOC103937917	probable sucrose-phosphate synthase 1	-2.7853	-3.6226	-2.0689
major CHO metabolism.synthesis.sucrose.SPS	LOC103946723	probable sucrose-phosphate synthase 1	-2.7979	-3.9368	-2.2639
major CHO metabolism.synthesis.sucrose.SPS	LOC103949182	probable sucrose-phosphate synthase 1	-1.6703	-2.6404	-1.1816
major CHO metabolism.synthesis.sucrose.SPS	LOC103952486	probable sucrose-phosphate synthase 1	-1.2992	-	-1.2508
major CHO metabolism.synthesis.sucrose.SPS	LOC103953884	probable sucrose-phosphate synthase 1	-0.69134	-1.0884	-0.60238
major CHO metabolism.synthesis.sucrose.SPS	LOC103956574	probable sucrose-phosphate synthase 4	-	-1.2874	-0.56891
major CHO metabolism.synthesis.sucrose.Susy	LOC103928399	sucrose synthase 2-like	-1.973	-3.2005	-1.4764
major CHO metabolism.synthesis.sucrose.Susy	LOC103928402	sucrose synthase 2-like	-3.8578	-4.1663	-1.8476
major CHO metabolism.synthesis.sucrose.Susy	LOC103935320	sucrose synthase	0.72422	0.83509	0.56772
major CHO metabolism.synthesis.sucrose.Susy	LOC103943695	sucrose synthase 2-like	2.4126	-	1.3148
major CHO metabolism.synthesis.sucrose.Susy	LOC103946870	sucrose synthase 6-like	-0.88624	-0.72379	-0.54753
major CHO metabolism.synthesis.sucrose.Susy	LOC103950289	sucrose synthase	-0.82079	-	-0.12752
major CHO metabolism.synthesis.sucrose.Susy	LOC103959924	sucrose synthase 5-like	-0.90217	-0.65536	-0.56832
major CHO metabolism.synthesis.sucrose.Susy	LOC103967199	sucrose synthase 2	-	-6.6297	-2.7723
major CHO metabolism.synthesis.sucrose.FBPase	LOC103935582	fructose-1,6-bisphosphatase, cytosolic-like	-2.8254	-2.6029	-1.945
major CHO metabolism.synthesis.sucrose.FBPase	LOC103949429	fructose-1,6-bisphosphatase, chloroplastic-like	2.0651	4.0171	1.9398
major CHO metabolism.synthesis.sucrose.FBPase	LOC103956105	fructose-1,6-bisphosphatase, chloroplastic	-0.41946	-	-0.3424
major CHO metabolism.synthesis.sucrose.FBPase	LOC103958011	fructose-1,6-bisphosphatase, cytosolic	-0.69524	-	-1.0226
major CHO metabolism.synthesis.sucrose.FBPase	LOC103959613	fructose-1,6-bisphosphatase, chloroplastic-like	-	3.8842	2.0538
major CHO metabolism.synthesis.sucrose.FBPase	LOC103959618	fructose-1,6-bisphosphatase, chloroplastic-like	3.0989	4.7391	1.8044
major CHO metabolism.synthesis.starch.debranching	LOC103933774	isoamylase 1, chloroplastic	-	0.73696	0.22266
major CHO metabolism.synthesis.starch.debranching	LOC103939342	isoamylase 2, chloroplastic-like	-	-0.46837	-0.54527
major CHO metabolism.synthesis.starch.debranching	LOC103962304	isoamylase 3, chloroplastic	0.55828	0.33984	0.36641
major CHO metabolism.degradation.sucrose.invertases.neutral	LOC103929245	probable alkaline/neutral invertase B	-	-2.0727	-0.78637
major CHO metabolism.degradation.sucrose.invertases.neutral	LOC103930070	alkaline/neutral invertase A, mitochondrial	-2.3876	-2.5093	-1.6608
major CHO metabolism.degradation.sucrose.invertases.neutral	LOC103947010	neutral/alkaline invertase 3, chloroplastic-like	-1.3102	-1.3558	-1.0816
major CHO metabolism.degradation.sucrose.invertases.neutral	LOC103948253	alkaline ceramidase 3-like	-	0.37255	0.17777
major CHO metabolism.degradation.sucrose.invertases.neutral	LOC103952542	probable alkaline/neutral invertase D	-	0.53838	0.23417
major CHO metabolism.degradation.sucrose.invertases.neutral	LOC103954196	alkaline/neutral invertase E, chloroplastic-like	-0.65884	-0.54706	-0.51289
major CHO metabolism.degradation.sucrose.invertases.neutral	LOC103954772	alkaline/neutral invertase E, chloroplastic-like	-0.62453	-0.71054	-0.73391
major CHO metabolism.degradation.sucrose.invertases.neutral	LOC103961265	alkaline/neutral invertase A, mitochondrial	-0.28414	0.48457	1.0183
major CHO metabolism.degradation.sucrose.invertases.neutral	LOC103962337	alkaline/neutral invertase A, mitochondrial-like	-	-0.92386	-0.59483
major CHO metabolism.degradation.sucrose.invertases.neutral	LOC103967666	probable alkaline/neutral invertase D	-0.48681	-	0.13798
major CHO metabolism.degradation.sucrose.invertases.cell wall	LOC103966444	beta-fructofuranosidase, insoluble isoenzyme 1-like	-	-4.8212	-2.137
major CHO metabolism.degradation.sucrose.invertases.cell wall	LOC103956493	beta-fructofuranosidase, insoluble isoenzyme 1-like	-	-3.9013	-1.6459
major CHO metabolism.degradation.sucrose.invertases.cell wall	LOC103961660	beta-fructofuranosidase, insoluble isoenzyme 1-like	5.0255	-	4.1119
major CHO metabolism.degradation.sucrose.invertases.vacuolar	LOC103959831	beta-fructofuranosidase, soluble isoenzyme I-like	-	2.0523	1.7587
major CHO metabolism.degradation.sucrose.invertases.vacuolar	LOC103931897	acid beta-fructofuranosidase-like	-	1.7593	1.7621
major CHO metabolism.degradation.sucrose.invertases.vacuolar	LOC103932673	beta-fructofuranosidase, soluble isoenzyme I-like	-	2.0906	1.8199
major CHO metabolism.degradation.sucrose.invertases.vacuolar	LOC103961960	beta-fructofuranosidase, soluble isoenzyme I-like	0.73965	2.7862	2.0531
major CHO metabolism.degradation.sucrose.invertases.vacuolar	LOC103963401	beta-fructofuranosidase, soluble isoenzyme I-like	-	2.0989	1.8637
major CHO metabolism.degradation.sucrose.hexokinase	LOC103927847	hexokinase-2, chloroplastic	1.2356	1.4908	1.157
major CHO metabolism.degradation.sucrose.hexokinase	LOC103929541	hexokinase-3-like	0.92068	-1.4091	-0.61991
major CHO metabolism.degradation.sucrose.hexokinase	LOC103931050	hexokinase-1-like	-0.3529	-	-0.25675
major CHO metabolism.degradation.sucrose.hexokinase	LOC103935714	hexokinase-3-like	0.6494	-1.4677	-0.50759
major CHO metabolism.degradation.sucrose.hexokinase	LOC103943909	hexokinase-1	-0.44943	-0.53565	-0.35015
major CHO metabolism.degradation.starch.starch cleavage.alpha amylase	LOC103926602	alpha-galactosidase-like	-1.6773	-1.1133	-0.79176
major CHO metabolism.degradation.starch.starch cleavage.alpha amylase	LOC103942444	alpha-galactosidase 1-like	1.3736	1.4102	1.1899
major CHO metabolism.degradation.starch.starch cleavage.alpha amylase	LOC103943123	alpha-galactosidase 1-like	1.5304	-	1.3862
major CHO metabolism.degradation.starch.starch cleavage.alpha amylase	LOC103943279	alpha-galactosidase 1-like	-	0.93724	0.47673
major CHO metabolism.degradation.starch.starch cleavage.alpha amylase	LOC103953750	alpha-galactosidase 3-like	-	-1.6129	-1.2735
major CHO metabolism.degradation.starch.starch cleavage.alpha amylase	LOC103953796	alpha-galactosidase 3-like	-0.82312	-1.3314	-0.75958
major CHO metabolism.degradation.sucrose.misc	LOC103928364	beta-galactosidase 5	-	1.8501	0.82132
major CHO metabolism.degradation.sucrose.misc	LOC103929681	beta-galactosidase-like	-	-	2.7953
major CHO metabolism.degradation.sucrose.misc	LOC103930633	beta-galactosidase 8-like	-2.5803	-3.6304	-2.1253
major CHO metabolism.degradation.sucrose.misc	LOC103933119	beta-galactosidase 17	-0.80889	-1.0159	-0.71942
major CHO metabolism.degradation.sucrose.misc	LOC103943992	beta-galactosidase	-3.9455	-7.3649	-2.5404
major CHO metabolism.degradation.sucrose.misc	LOC103946789	beta-galactosidase 6	1.1312	-	0.88228
major CHO metabolism.degradation.sucrose.misc	LOC103957168	beta-galactosidase 1	-1.1287	-1.2574	-1.1817
major CHO metabolism.degradation.sucrose.misc	LOC103962054	beta-galactosidase 5-like	1.0024	2.2159	1.2843
major CHO metabolism.degradation.sucrose.misc	LOC103963481	beta-galactosidase 11-like	1.1135	1.0027	0.83766
major CHO metabolism.degradation.sucrose.misc	LOC103965526	beta-galactosidase 16	0.91526	0.80181	0.90225
-: Not significantlly differentially expressed
-: Not significantlly differentially expressed
